# Supplementary material for: Repertoire of BALB/c Mice Natural Anti-Carbohydrate Antibodies: Mice vs. Humans Difference, and Otherness of Individual Animals
Source: PubMed Central journal article supplement (PMC5681490; doi:10.3389/fimmu.2017.01449), 2017-11-06
Supplement: data_sheet_1.pdf [file data_sheet_1.pdf]

## *Supplementary Material*

# Repertoire of BALB/c mice natural anti-carbohydrate antibodies: mice vs. humans difference, and otherness of individual animals

Daniel Bello-Gil<sup>1,\*</sup>, Nailya Khasbiullina<sup>2</sup>, Nadezhda Shilova<sup>2</sup>, Nicolai Bovin<sup>2</sup> and Rafael Mañez<sup>1,3</sup>

\* Correspondence: dbello@idibell.cat

**Table S1.** List of glycans, their binding to natural circulating antibodies (IgM+IgG) of BALB/c mice (n=20), expressed in relative fluorescence units (RFU) as median  $\pm$  median absolute deviation (MAD), and the number of animals exceeding *cut off* ( $\geq 4000$  RFU).

| Glycan ID (#) | Structure                                                             | Common Name        | Median and MAD as RFU |      | Animals showing RFU $\geq 4000$ |
|---------------|-----------------------------------------------------------------------|--------------------|-----------------------|------|---------------------------------|
|               |                                                                       |                    | Median                | MAD  |                                 |
| 001           | Fuc $\alpha$ -sp3                                                     |                    | 1590                  | 342  | 1                               |
| 002           | Gal $\alpha$ -sp3                                                     |                    | 1522                  | 316  | 0                               |
| 003           | Gal $\beta$ -sp3                                                      |                    | 11858                 | 1420 | 12                              |
| 004           | GalNAc $\alpha$ 1-OSer                                                | T <sub>n</sub> Ser | 2145                  | 395  | 2                               |
| 005           | GalNAc $\alpha$ -sp3                                                  | T <sub>n</sub>     | 1642                  | 192  | 2                               |
| 006           | GalNAc $\beta$ -sp3                                                   |                    | 1001                  | 250  | 0                               |
| 007           | Glc $\alpha$ -sp3                                                     |                    | 1242                  | 222  | 0                               |
| 009           | Glc $\beta$ -sp3                                                      |                    | 1576                  | 325  | 0                               |
| 010           | GlcNAc $\beta$ -sp3                                                   |                    | 4124                  | 471  | 1                               |
| 011           | GlcNAc $\beta$ -sp2                                                   |                    | 4634                  | 607  | 2                               |
| 012           | GlcNAc $\beta$ -sp7                                                   |                    | 2068                  | 523  | 2                               |
| 013           | GlcNAc $\beta$ -sp8                                                   |                    | 7267                  | 1117 | 9                               |
| 014           | GlcN(Gc) $\beta$ -sp4                                                 |                    | 914                   | 203  | 0                               |
| 015           | HOCH <sub>2</sub> (HOCH) <sub>4</sub> CH <sub>2</sub> NH <sub>2</sub> | aminoglucitol      | 1374                  | 316  | 0                               |
| 016           | Man $\alpha$ -sp3                                                     |                    | 1164                  | 263  | 0                               |
| 017           | Man $\alpha$ -sp4                                                     |                    | 1567                  | 369  | 0                               |
| 018           | Man $\beta$ -sp4                                                      |                    | 1842                  | 319  | 2                               |
| 019           | ManNAc $\beta$ -sp4                                                   |                    | 4752                  | 390  | 4                               |
| 020           | Rha $\alpha$ -sp3                                                     |                    | 970                   | 308  | 0                               |

Supplementary Material

|     |                                                    |                           |       |      |    |
|-----|----------------------------------------------------|---------------------------|-------|------|----|
| 021 | Gal $\beta$ -sp4                                   |                           | 1338  | 269  | 0  |
| 022 | GlcNAc $\beta$ -sp4                                |                           | 932   | 230  | 0  |
| 023 | GalNAc $\beta$ -sp4                                |                           | 1246  | 271  | 0  |
| 024 | GlcNAc $\alpha$ -sp3                               |                           | 1463  | 260  | 2  |
| 025 | GalNAc $\beta$ -sp10                               |                           | 848   | 209  | 0  |
| 026 | Rha $\beta$ -sp4                                   |                           | 1098  | 227  | 0  |
| 027 | 3,6-Me2Glc                                         | DMG                       | 673   | 123  | 0  |
| 028 | Xyl $\beta$ -sp4                                   |                           | 1411  | 302  | 0  |
| 029 | Fuc $\beta$ -sp4                                   |                           | 1139  | 301  | 0  |
| 030 | Glc $\beta$ -sp4                                   |                           | 1449  | 429  | 1  |
| 031 | L-Ara $\alpha$ -sp4                                |                           | 1099  | 369  | 0  |
| 032 | GalNGc $\beta$ -sp3                                |                           | 483   | 119  | 0  |
| 037 | 3-O-Su-Gal $\beta$ -sp3                            |                           | 2317  | 503  | 3  |
| 038 | 3-O-Su-GalNAc $\beta$ -sp3                         |                           | 3657  | 689  | 7  |
| 041 | 6-O-Su-GalNAc $\alpha$ -sp3                        |                           | 5504  | 1443 | 7  |
| 043 | 6-O-Su-GlcNAc $\beta$ -sp3                         |                           | 1040  | 253  | 1  |
| 044 | GlcA $\alpha$ -sp3                                 | $\alpha$ -glucuronic acid | 1275  | 327  | 0  |
| 045 | GlcA $\beta$ -sp3                                  | $\beta$ -glucuronic acid  | 1671  | 335  | 1  |
| 046 | 6-H <sub>2</sub> PO <sub>3</sub> Glc $\beta$ -sp4  | $\beta$ -Glc6P            | 1369  | 316  | 0  |
| 047 | 6-H <sub>2</sub> PO <sub>3</sub> Man $\alpha$ -sp3 | $\alpha$ -Man6P           | 1300  | 322  | 0  |
| 048 | Neu5Ac $\alpha$ -sp3                               |                           | 583   | 131  | 0  |
| 049 | Neu5Ac $\alpha$ -sp9                               |                           | 1349  | 334  | 3  |
| 050 | Neu5Ac $\beta$ -sp3                                |                           | 2184  | 526  | 3  |
| 051 | Neu5Ac $\beta$ -sp9                                |                           | 1698  | 609  | 3  |
| 052 | Neu5Gc $\alpha$ -sp3                               |                           | 847   | 286  | 0  |
| 053 | Neu5Gc $\beta$ -sp3                                |                           | 1202  | 307  | 0  |
| 054 | 9-NAc-Neu5Ac $\alpha$ -sp3                         |                           | 256   | 77   | 0  |
| 055 | 3-O-Su-GlcNAc $\beta$ -sp3                         |                           | 840   | 214  | 0  |
| 056 | Gal $\alpha$ -sp7                                  |                           | 1016  | 263  | 0  |
| 057 | Rib -sp4                                           |                           | 1153  | 248  | 0  |
| 058 | Fuc $\beta$ -sp3                                   |                           | 2266  | 422  | 1  |
| 059 | Crypted                                            | Crypted                   | 1360  | 389  | 0  |
| 060 | 6-O-Su-Gal $\beta$ -sp3                            |                           | 61113 | 1156 | 20 |
| 061 | 3-OSu-GalNAc $\alpha$ -sp3                         |                           | 2692  | 622  | 3  |
| 071 | Fuc $\alpha$ 1-2Gal $\beta$ -sp3                   | H <sub>di</sub>           | 1077  | 245  | 1  |
| 072 | Fuc $\alpha$ 1-3GlcNAc $\beta$ -sp3                |                           | 1424  | 300  | 2  |

|     |                                         |                                        |       |      |    |
|-----|-----------------------------------------|----------------------------------------|-------|------|----|
| 073 | Fuc $\alpha$ 1-4GlcNAc $\beta$ -sp3     | Le                                     | 755   | 217  | 0  |
| 074 | Fuc $\beta$ 1-3GlcNAc $\beta$ -sp3      |                                        | 533   | 130  | 0  |
| 075 | Gal $\alpha$ 1-2Gal $\beta$ -sp3        |                                        | 790   | 184  | 0  |
| 076 | Gal $\alpha$ 1-3Gal $\beta$ -sp3        | B <sub>di</sub>                        | 775   | 192  | 0  |
| 077 | Gal $\alpha$ 1-3GalNAc $\beta$ -sp3     | T <sub><math>\alpha\beta</math></sub>  | 668   | 155  | 0  |
| 078 | Gal $\alpha$ 1-3GalNAc $\alpha$ -sp3    | T <sub><math>\alpha\alpha</math></sub> | 581   | 113  | 0  |
| 080 | Gal $\alpha$ 1-3GlcNAc $\beta$ -sp3     |                                        | 384   | 76   | 0  |
| 081 | Gal $\alpha$ 1-4GlcNAc $\beta$ -sp3     | $\alpha$ -LN                           | 815   | 183  | 1  |
| 082 | Gal $\alpha$ 1-4GlcNAc $\beta$ -sp8     | $\alpha$ -LN                           | 713   | 144  | 1  |
| 083 | Gal $\alpha$ 1-6Glc $\beta$ -sp4        | melibiose                              | 2285  | 348  | 2  |
| 084 | Gal $\beta$ 1-2Gal $\beta$ -sp3         |                                        | 1332  | 301  | 1  |
| 086 | Gal $\beta$ 1-3GlcNAc $\beta$ -sp2      | Le <sup>C</sup>                        | 609   | 130  | 0  |
| 087 | Gal $\beta$ 1-3Gal $\beta$ -sp3         |                                        | 1488  | 282  | 1  |
| 088 | Gal $\beta$ 1-3GalNAc $\beta$ -sp3      | T <sub><math>\beta\beta</math></sub>   | 1468  | 174  | 2  |
| 089 | Gal $\beta$ 1-3GalNAc $\alpha$ -sp3     | TF                                     | 297   | 59   | 0  |
| 092 | Gal $\beta$ 1-4Glc $\beta$ -sp2         | Lactose, Lac                           | 889   | 182  | 0  |
| 093 | Gal $\beta$ 1-4Glc $\beta$ -sp4         | Lactose, Lac                           | 1089  | 290  | 0  |
| 094 | Gal $\beta$ 1-4Gal $\beta$ -sp4         |                                        | 1124  | 278  | 0  |
| 096 | Gal $\beta$ 1-4GlcNAc $\beta$ -sp2      | N-acetyllactosamine, LN                | 2604  | 893  | 1  |
| 097 | Gal $\beta$ 1-4GlcNAc $\beta$ -sp3      | N-acetyllactosamine, LN                | 491   | 103  | 0  |
| 098 | Gal $\beta$ 1-4GlcNAc $\beta$ -sp5      | N-acetyllactosamine, LN                | 341   | 65   | 0  |
| 099 | Gal $\beta$ 1-4GlcNAc $\beta$ -sp8      | N-acetyllactosamine, LN                | 357   | 65   | 1  |
| 100 | Gal $\beta$ 1-6Gal $\beta$ -sp4         |                                        | 18406 | 2396 | 15 |
| 101 | GalNAc $\alpha$ 1-3GalNAc $\beta$ -sp3  | Fs-2                                   | 1158  | 307  | 1  |
| 102 | GalNAc $\alpha$ 1-3Gal $\beta$ -sp3     | A <sub>di</sub>                        | 1199  | 295  | 1  |
| 103 | GalNAc $\alpha$ 1-3GalNAc $\alpha$ -sp3 | core 5                                 | 451   | 87   | 0  |
| 104 | GalNAc $\beta$ 1-3Gal $\beta$ -sp3      |                                        | 603   | 144  | 0  |
| 105 | GalNAc $\beta$ 1-3GalNAc $\beta$ -sp3   | para-Fs                                | 5975  | 1065 | 11 |
| 106 | GalNAc $\beta$ 1-4GlcNAc $\beta$ -sp3   | LacdiNAc                               | 332   | 79   | 0  |
| 107 | GalNAc $\beta$ 1-4GlcNAc $\beta$ -sp2   | LacdiNAc                               | 390   | 95   | 0  |
| 110 | Glc $\alpha$ 1-4Glc $\beta$ -sp3        | maltose                                | 10870 | 2172 | 10 |
| 111 | Glc $\beta$ 1-4Glc $\beta$ -sp4         | cellobiose                             | 3363  | 407  | 3  |
| 112 | Glc $\beta$ 1-6Glc $\beta$ -sp4         | gentiobiose                            | 6968  | 1229 | 5  |
| 113 | GlcNAc $\beta$ 1-3GalNAc $\alpha$ -sp3  | core 3                                 | 4852  | 620  | 3  |
| 114 | GlcNAc $\beta$ 1-3Man $\beta$ -sp4      |                                        | 1474  | 423  | 2  |
| 115 | GlcNAc $\beta$ 1-4GlcNAc $\beta$ -Asn   | chitobiose-Asn                         | 12575 | 2669 | 14 |
| 116 | GlcNAc $\beta$ 1-4GlcNAc $\beta$ -sp3   | chitobiose                             | 1040  | 186  | 1  |

## Supplementary Material

|     |                                                     |            |       |      |    |
|-----|-----------------------------------------------------|------------|-------|------|----|
| 117 | GlcNAc $\beta$ 1-4GlcNAc $\beta$ -sp4               | chitobiose | 8585  | 1418 | 11 |
| 118 | GlcNAc $\beta$ 1-6GalNAc $\alpha$ -sp3              | core 6     | 7860  | 714  | 4  |
| 119 | Man $\alpha$ 1-2Man $\beta$ -sp4                    |            | 1200  | 259  | 0  |
| 120 | Man $\alpha$ 1-3Man $\beta$ -sp4                    |            | 1224  | 338  | 0  |
| 121 | Man $\alpha$ 1-4Man $\beta$ -sp4                    |            | 1064  | 328  | 0  |
| 122 | Man $\alpha$ 1-6Man $\beta$ -sp4                    |            | 1484  | 380  | 0  |
| 123 | Man $\beta$ 1-4GlcNAc $\beta$ -sp4                  |            | 2103  | 428  | 2  |
| 125 | 6-Bn-Gal $\beta$ 1-4GlcNAc $\beta$ -sp2             |            | 32674 | 5389 | 19 |
| 126 | 6-Bn-Gal $\alpha$ 1-4(6-Bn)GlcNAc $\beta$ -sp3      |            | 15410 | 3185 | 15 |
| 127 | Gal $\beta$ 1-4Glc $\beta$ -dipeptide               |            | 559   | 105  | 0  |
| 128 | Gal $\beta$ 1-4Glc $\beta$ -dipeptide               |            | 1181  | 263  | 0  |
| 129 | Gal $\beta$ 1-3(6-O-Bn)GlcNAc $\beta$ -sp3          |            | 683   | 184  | 0  |
| 130 | (6-O-Bn-Gal $\beta$ 1)-3GlcNAc $\beta$ -sp3         |            | 378   | 104  | 0  |
| 131 | (6-O-Bn-Gal $\beta$ 1)-3(6-O-Bn)GlcNAc $\beta$ -sp3 |            | 1908  | 494  | 2  |
| 132 | Gal $\beta$ 1-3GalNAc $\alpha$ -sp5                 | TF         | 376   | 72   | 0  |
| 133 | Gal $\beta$ 1-4Glc $\beta$ -dipeptide               |            | 6816  | 465  | 4  |
| 134 | Gal $\beta$ 1-4Glc $\beta$ -dipeptide               |            | 1197  | 271  | 0  |
| 135 | Gal $\beta$ 1-4Glc $\beta$ -dipeptide               |            | 941   | 330  | 0  |
| 136 | Gal $\beta$ 1-4Glc $\beta$ -dipeptide               |            | 476   | 98   | 0  |
| 137 | Gal $\beta$ 1-4Glc $\beta$ -dipeptide               |            | 589   | 88   | 0  |
| 138 | Gal $\beta$ 1-4Glc $\beta$ -dipeptide               |            | 571   | 130  | 0  |
| 139 | Gal $\beta$ 1-4Glc $\alpha$ -sp3                    |            | 395   | 65   | 0  |
| 140 | Gal $\alpha$ 1-3GalNAc(fur) $\beta$ -sp3            |            | 608   | 117  | 0  |
| 142 | GlcNAc $\alpha$ 1-3GalNAc $\beta$ -sp3              |            | 4523  | 1339 | 4  |
| 143 | Fuc $\alpha$ 1-2(3-O-Su)Gal $\beta$ -sp3            |            | 468   | 138  | 0  |
| 144 | Gal $\beta$ 1-3(6-O-Su)GlcNAc $\beta$ -sp2          |            | 297   | 73   | 0  |
| 145 | Gal $\beta$ 1-3(6-O-Su)GlcNAc $\beta$ -sp3          |            | 388   | 76   | 0  |
| 146 | Gal $\beta$ 1-4(6-O-Su)Glc $\beta$ -sp2             |            | 2044  | 469  | 2  |
| 149 | GlcNAc $\beta$ 1-4(6-O-Su)GlcNAc $\beta$ -sp2       |            | 2569  | 475  | 5  |
| 150 | 3-O-Su-Gal $\beta$ 1-3GalNAc $\alpha$ -sp3          |            | 37943 | 3232 | 20 |
| 151 | 6-O-Su-Gal $\beta$ 1-3GalNAc $\alpha$ -sp3          |            | 1840  | 250  | 2  |
| 152 | 3-O-Su-Gal $\beta$ 1-4Glc $\beta$ -sp2              | SM3        | 2564  | 413  | 2  |
| 153 | 6-O-Su-Gal $\beta$ 1-4Glc $\beta$ -sp2              |            | 1796  | 504  | 2  |
| 154 | 3-O-Su-Gal $\beta$ 1-3GlcNAc $\beta$ -sp3           |            | 32651 | 3954 | 20 |
| 156 | 3-O-Su-Gal $\beta$ 1-4GlcNAc $\beta$ -sp2           |            | 2305  | 458  | 1  |
| 158 | 4-O-Su-Gal $\beta$ 1-4GlcNAc $\beta$ -sp2           |            | 2927  | 860  | 2  |

|     |                                                       |                       |       |      |    |
|-----|-------------------------------------------------------|-----------------------|-------|------|----|
| 159 | 4-O-Su-Galβ1-4GlcNAcβ-sp3                             |                       | 1656  | 736  | 2  |
| 160 | 6-O-Su-Galβ1-3GlcNAcβ-sp2                             |                       | 346   | 142  | 0  |
| 161 | 6-O-Su-Galβ1-3GlcNAcβ-sp3                             |                       | 536   | 141  | 0  |
| 162 | 6-O-Su-Galβ1-4GlcNAcβ-sp2                             |                       | 5615  | 1540 | 7  |
| 164 | GlcAβ1-3GlcNAcβ-sp3                                   |                       | 979   | 218  | 1  |
| 165 | GlcAβ1-3Galβ-sp3                                      |                       | 1035  | 308  | 1  |
| 166 | GlcAβ1-6Galβ-sp3                                      |                       | 39105 | 2993 | 17 |
| 167 | GlcNAcβ1-4-[HOOC(CH <sub>3</sub> )CH]-3-O-GlcNAcβ-sp4 | GlcNAc-Mur            | 1012  | 269  | 1  |
| 168 | GlcNAcβ1-4Mur-L-Ala-D-i-Gln-Lys                       | GMDP-Lys              | 3668  | 152  | 1  |
| 169 | Neu5Acα2-3Galβ-sp3                                    | GM4                   | 2305  | 596  | 3  |
| 170 | Neu5Acα2-6Galβ-sp3                                    |                       | 4157  | 633  | 3  |
| 171 | Neu5Acα2-3GalNAcα-sp3                                 | 3-SiaT <sub>n</sub>   | 844   | 168  | 1  |
| 172 | Neu5Acα2-6GalNAcα-sp3                                 | SiaT <sub>n</sub>     | 3250  | 124  | 1  |
| 173 | Neu5Acβ2-6GalNAcα-sp3                                 | b-SiaT <sub>n</sub>   | 3221  | 855  | 5  |
| 174 | Neu5Gcα2-6GalNAcα-sp3                                 | Neu5Gc-T <sub>n</sub> | 1596  | 178  | 1  |
| 175 | Neu5Gcβ2-6GalNAcα-sp3                                 |                       | 1453  | 451  | 2  |
| 176 | 3-O-Su-Galβ1-4(6-O-Su)Glcβ-sp2                        |                       | 43008 | 9342 | 20 |
| 177 | 3-O-Su-Galβ1-4(6-O-Su)GlcNAcβ-sp3                     |                       | 32496 | 7215 | 20 |
| 178 | 6-O-Su-Galβ1-4(6-O-Su)Glcβ-sp2                        |                       | 3506  | 763  | 5  |
| 179 | 6-O-Su-Galβ1-3(6-O-Su)GlcNAcβ-sp2                     |                       | 1770  | 580  | 0  |
| 180 | 6-O-Su-Galβ1-4(6-O-Su)GlcNAcβ-sp2                     |                       | 2991  | 832  | 4  |
| 181 | 3,4-O-Su <sub>2</sub> -Galβ1-4GlcNAcβ-sp3             |                       | 2993  | 820  | 5  |
| 182 | 3,6-O-Su <sub>2</sub> -Galβ1-4GlcNAcβ-sp2             |                       | 487   | 151  | 0  |
| 183 | 4,6-O-Su <sub>2</sub> -Galβ1-4GlcNAcβ-sp2             |                       | 4401  | 944  | 4  |
| 184 | 4,6-O-Su <sub>2</sub> -Galβ1-4GlcNAcβ-sp3             |                       | 1945  | 649  | 2  |
| 186 | Neu5Acα2-8Neu5Acα2-sp3                                | (Sia) <sub>2</sub>    | 190   | 64   | 0  |
| 187 | 3-O-Su-Galβ1-4(6-O-Su)Glcβ-sp2                        |                       | 290   | 91   | 0  |
| 188 | Neu5Acα2-8Neu5Acβ-sp9                                 |                       | 1162  | 382  | 2  |
| 189 | 3,6-O-Su <sub>2</sub> -Galβ1-4(6-O-Su)GlcNAcβ-sp2     |                       | 2054  | 543  | 3  |
| 190 | Galβ1-4-(6-P)GlcNAcβ-sp2                              |                       | 1217  | 347  | 1  |
| 191 | 6-P-Galβ1-4GlcNAcβ-sp2                                |                       | 926   | 194  | 1  |
| 192 | GalNAcβ1-4(6-O-Su)GlcNAcβ-sp3                         |                       | 483   | 106  | 0  |
| 193 | 3-O-Su-GalNAcβ1-4GlcNAcβ-sp3                          |                       | 3103  | 626  | 4  |
| 194 | 6-O-Su-GalNAcβ1-4GlcNAcβ-sp3                          |                       | 2884  | 455  | 4  |
| 195 | 6-O-Su-GalNAcβ1-4-(3-O-Ac)GlcNAcβ-sp3                 |                       | 589   | 122  | 0  |
| 196 | 3-O-Su-GalNAcβ1-4(3-O-Su)-GlcNAcβ-sp3                 |                       | 605   | 123  | 1  |
| 197 | 3,6-O-Su <sub>2</sub> -GalNAcβ1-4-GlcNAcβ-sp3         |                       | 287   | 54   | 0  |

Supplementary Material

|     |                                                       |                                          |       |      |    |
|-----|-------------------------------------------------------|------------------------------------------|-------|------|----|
| 198 | 4,6-O-Su <sub>2</sub> -GalNAcβ1-4GlcNAcβ-sp3          |                                          | 2251  | 407  | 1  |
| 199 | 4,6-O-Su <sub>2</sub> -GalNAcβ1-4-(3-O-Ac)GlcNAcβ-sp3 |                                          | 690   | 178  | 0  |
| 200 | 4-O-Su-GalNAcβ1-4GlcNAcβ-sp3                          |                                          | 466   | 134  | 0  |
| 201 | 3,4-O-Su <sub>2</sub> -GalNAcβ1-4-GlcNAcβ-sp3         |                                          | 3790  | 859  | 6  |
| 202 | 6-O-Su-GalNAcβ1-4(6-O-Su)GlcNAcβ-sp3                  |                                          | 4471  | 933  | 8  |
| 203 | Galβ1-4(6-O-Su)GlcNAcβ-sp2                            |                                          | 5424  | 1203 | 8  |
| 204 | 4-O-Su-GalNAcβ1-4GlcNAcβ-sp2                          |                                          | 753   | 120  | 1  |
| 205 | Neu5Acα2-6GalNAcβ-sp3                                 |                                          | 606   | 111  | 1  |
| 206 | Neu5Gcα2-3Gal-sp3                                     |                                          | 1295  | 371  | 0  |
| 207 | Neu5Acβ2-6GalNAcβ-sp3                                 |                                          | 2913  | 646  | 3  |
| 208 | Galβ1-3GlcNAcβ-sp4                                    | Le <sup>C</sup>                          | 658   | 172  | 0  |
| 209 | Crypted                                               | Crypted                                  | 6503  | 1331 | 9  |
| 210 | Crypted                                               | Crypted                                  | 1743  | 558  | 1  |
| 211 | Crypted                                               | Crypted                                  | 8440  | 1533 | 13 |
| 212 | Crypted                                               | Crypted                                  | 2129  | 530  | 3  |
| 213 | Neu5Acβ2-6Galβ-sp3                                    |                                          | 2672  | 827  | 3  |
| 214 | ΔGlcAβ1-3Galβ-sp3                                     | deltaGlcAβ3Gal                           | 589   | 161  | 0  |
| 215 | Fuca1-2Galβ1-3GlcNAcβ-sp3                             | Le <sup>d</sup> , H (type 1)             | 2727  | 444  | 3  |
| 216 | Fuca1-2Galβ1-4GlcNAcβ-sp3                             | H (type 2)                               | 10845 | 2895 | 15 |
| 217 | Fuca1-2Galβ1-3GalNAcα-sp3                             | H (type 3)                               | 3108  | 468  | 6  |
| 219 | Fuca1-2Galβ1-4Glcβ-sp4                                | H (type 6)-Gly                           | 8251  | 1687 | 10 |
| 220 | Galα1-3Galβ1-4Glcβ-sp2                                |                                          | 901   | 275  | 0  |
| 221 | Galα1-3Galβ1-4Glcβ-sp4                                |                                          | 1230  | 393  | 2  |
| 222 | Galα1-3Galβ1-4GlcNAcβ-sp3                             | Galili (tri)                             | 254   | 106  | 0  |
| 223 | Galα1-4Galβ1-4Glcβ-sp2                                | P <sup>k</sup> , Gb3, GbOse <sub>3</sub> | 756   | 247  | 0  |
| 225 | Galα1-4Galβ1-4GlcNAcβ-sp2                             | P <sub>1</sub>                           | 573   | 165  | 0  |
| 226 | Galα1-3(Fuca1-2)Galβ-sp3                              | B <sub>tri</sub>                         | 1227  | 312  | 1  |
| 227 | Galα1-3(Fuca1-2)Galβ-sp5                              | B <sub>tri</sub> -C8                     | 1044  | 248  | 1  |
| 228 | Galβ1-2Galα1-3GlcNAcβ-sp3                             |                                          | 321   | 87   | 0  |
| 229 | Galβ1-3Galβ1-4GlcNAcβ-sp4                             |                                          | 323   | 81   | 0  |
| 230 | Galβ1-4Galβ1-4Glcβ-sp2                                | Mc3                                      | 248   | 84   | 0  |
| 232 | Galβ1-4GlcNAcβ1-6GalNAcα-sp3                          |                                          | 624   | 81   | 1  |
| 233 | Galβ1-3(Fuca1-4)GlcNAcβ-sp3                           | Le <sup>A</sup>                          | 210   | 58   | 0  |
| 234 | Galβ1-4(Fuca1-3)GlcNAcβ-sp3                           | Le <sup>X</sup>                          | 13573 | 2635 | 16 |
| 235 | GalNAcα1-3(Fuca1-2)Galβ-sp3                           | A <sub>tri</sub>                         | 586   | 306  | 1  |
| 236 | GalNAcα1-3(Fuca1-2)Galβ-sp5                           | A <sub>tri</sub>                         | 498   | 262  | 1  |

|     |                                                                                                              |                  |       |      |    |
|-----|--------------------------------------------------------------------------------------------------------------|------------------|-------|------|----|
| 237 | GalNH $\alpha$ 1-3<br>Gal $\beta$ -OCH <sub>2</sub> CH <sub>2</sub> CH <sub>2</sub> NHAc<br>Fuc $\alpha$ 1-2 |                  | 357   | 135  | 0  |
| 239 | GalNAc $\beta$ 1-3(Fuc $\alpha$ 1-2)Gal $\beta$ -sp3                                                         |                  | 849   | 654  | 1  |
| 240 | (Glc $\alpha$ 1-4) <sub>3</sub> $\beta$ -sp4                                                                 | maltotriose      | 11233 | 1567 | 6  |
| 241 | (Glc $\alpha$ 1-6) <sub>3</sub> $\beta$ -sp4                                                                 | isomaltotriose   | 520   | 163  | 0  |
| 242 | GlcNAc $\alpha$ 1-3Gal $\beta$ 1-4GlcNAc $\beta$ -sp2                                                        |                  | 278   | 90   | 0  |
| 243 | GlcNAc $\alpha$ 1-3Gal $\beta$ 1-4GlcNAc $\beta$ -sp3                                                        |                  | 215   | 61   | 0  |
| 245 | GlcNAc $\alpha$ 1-6Gal $\beta$ 1-4GlcNAc $\beta$ -sp2                                                        |                  | 3394  | 1053 | 3  |
| 246 | GlcNAc $\beta$ 1-2Gal $\beta$ 1-3GalNAc $\alpha$ -sp3                                                        |                  | 434   | 94   | 0  |
| 247 | GlcNAc $\beta$ 1-3Gal $\beta$ 1-3GalNAc $\alpha$ -sp3                                                        |                  | 321   | 63   | 0  |
| 248 | GlcNAc $\beta$ 1-3Gal $\beta$ 1-4Glc $\beta$ -sp2                                                            |                  | 822   | 179  | 0  |
| 249 | GlcNAc $\beta$ 1-3Gal $\beta$ 1-4GlcNAc $\beta$ -sp2                                                         |                  | 1652  | 322  | 2  |
| 250 | GlcNAc $\beta$ 1-3Gal $\beta$ 1-4GlcNAc $\beta$ -sp3                                                         |                  | 1942  | 488  | 2  |
| 251 | GlcNAc $\beta$ 1-4Gal $\beta$ 1-4GlcNAc $\beta$ -sp2                                                         |                  | 1067  | 216  | 1  |
| 252 | GlcNAc $\beta$ 1-4GlcNAc $\beta$ 1-4GlcNAc $\beta$ -sp4                                                      | chitotriose      | 1111  | 206  | 2  |
| 253 | GlcNAc $\beta$ 1-6Gal $\beta$ 1-4GlcNAc $\beta$ -sp2                                                         |                  | 2877  | 653  | 3  |
| 254 | GlcNAc $\beta$ 1-6(Gal $\beta$ 1-3)GalNAc $\alpha$ -sp3                                                      | core 2           | 2499  | 525  | 4  |
| 255 | GlcNAc $\beta$ 1-6(GlcNAc $\beta$ 1-3)GalNAc $\alpha$ -sp3                                                   | core 4           | 5853  | 425  | 4  |
| 256 | GlcNAc $\beta$ 1-6(GlcNAc $\beta$ 1-4)GalNAc $\alpha$ -sp3                                                   |                  | 5020  | 613  | 8  |
| 258 | Man $\alpha$ 1-6(Man $\alpha$ 1-3)Man $\beta$ -sp4                                                           | Man <sub>3</sub> | 743   | 160  | 0  |
| 259 | Gal $\beta$ 1-4(Gal $\beta$ 1-3)GlcNAc $\beta$ -sp3                                                          |                  | 372   | 58   | 0  |
| 260 | Fuc $\beta$ 1-4<br>GlcNAc $\beta$ -sp3                                                                       |                  | 663   | 140  | 0  |
|     | Gal $\beta$ 1-3                                                                                              |                  |       |      |    |
| 261 | Fuc $\beta$ 1-3<br>GlcNAc $\beta$ -sp3                                                                       |                  | 299   | 62   | 0  |
|     | Gal $\beta$ 1-4                                                                                              |                  |       |      |    |
| 262 | Gal $\beta$ 1-3GalNAc $\beta$ 1-3Gal-sp4                                                                     |                  | 437   | 120  | 0  |
| 263 | (GalNAc $\beta$ -PEG2) <sub>3</sub> - $\beta$ -DD                                                            |                  | 657   | 114  | 0  |
| 264 | Gal $\beta$ 1-4Gal $\beta$ 1-4GlcNAc $\beta$ -sp3                                                            |                  | 461   | 87   | 0  |
| 266 | Gal $\alpha$ 1-4Gal $\beta$ 1-4GlcNAc $\beta$ -sp3                                                           | P <sub>1</sub>   | 1017  | 227  | 0  |
| 267 | GlcNAc $\beta$ 1-3Gal $\beta$ 1-3GlcNAc $\beta$ -sp3                                                         |                  | 718   | 138  | 0  |
| 268 | GlcNAc $\beta$ 1-4(Fuc $\alpha$ 1-6)GlcNAc $\beta$ -sp3                                                      |                  | 1291  | 311  | 1  |
| 269 | Gal $\beta$ 1-3Gal $\beta$ 1-4Glc $\beta$ -sp4                                                               |                  | 518   | 137  | 0  |
| 270 | Gal $\beta$ 1-4Gal $\beta$ 1-4Glc $\beta$ -sp4                                                               |                  | 939   | 202  | 0  |
| 271 | Gal $\beta$ 1-6Gal $\beta$ 1-4Glc $\beta$ -sp4                                                               |                  | 53622 | 1934 | 20 |

Supplementary Material

|     |                                                                                                  |                        |       |      |    |
|-----|--------------------------------------------------------------------------------------------------|------------------------|-------|------|----|
| 272 | Neu5Ac $\alpha$ 2-3Gal $\beta$ 1-4Glc $\beta$ -sp4-Cit                                           | 3'-SL -citrullin       | 236   | 60   | 0  |
| 273 | Fuc $\beta$ 1-2Gal $\beta$ 1-4GlcNAc $\beta$ -sp3                                                |                        | 242   | 60   | 0  |
| 274 | GalNAc $\alpha$ 1-3Gal $\beta$ 1-4GlcNAc-sp3                                                     |                        | 426   | 90   | 0  |
| 275 | GalNAc $\beta$ 1-3Gal $\beta$ 1-4GlcNAc-sp3                                                      |                        | 403   | 103  | 0  |
| 276 | GlcNAc $\beta$ 1-4Gal $\beta$ 1-4GlcNAc $\beta$ -sp3                                             |                        | 1357  | 456  | 2  |
| 277 | GalNGc $\alpha$ 1-3(Fuc $\alpha$ 1-2)Gal $\beta$ -sp3                                            | N-Gc-A <sub>tri</sub>  | 375   | 99   | 0  |
| 287 | 3-O-Su-Gal $\beta$ 1-3(Fuc $\alpha$ 1-4)GlcNAc $\beta$ -sp3                                      | 3'-OSu-Le <sup>A</sup> | 20063 | 4962 | 19 |
| 288 | 3-O-Su-Gal $\beta$ 1-4(Fuc $\alpha$ 1-3)GlcNAc $\beta$ -sp3                                      | 3'-OSu-Le <sup>X</sup> | 593   | 146  | 0  |
| 289 | Neu5Ac $\alpha$ 2-6(Gal $\beta$ 1-3)GalNAc $\alpha$ -sp3                                         |                        | 296   | 88   | 0  |
| 290 | Neu5Ac $\alpha$ 2-6(Gal $\alpha$ 1-3)GalNAc $\alpha$ -sp3                                        |                        | 262   | 68   | 0  |
| 291 | Neu5Ac $\beta$ 2-6(Gal $\beta$ 1-3)GalNAc $\alpha$ -sp3                                          |                        | 1887  | 727  | 3  |
| 292 | Neu5Ac $\alpha$ 2-3Gal $\beta$ 1-3GalNAc $\alpha$ -sp3                                           |                        | 4477  | 1186 | 4  |
| 293 | Neu5Ac $\alpha$ 2-3Gal $\beta$ 1-4Glc $\beta$ -sp3                                               | 3'SL                   | 1684  | 349  | 1  |
| 294 | Neu5Ac $\alpha$ 2-3Gal $\beta$ 1-4Glc $\beta$ -sp4                                               | 3'SL                   | 363   | 99   | 0  |
| 295 | Neu5Ac $\alpha$ 2-6Gal $\beta$ 1-4Glc $\beta$ -sp2                                               | 6'SL                   | 290   | 66   | 0  |
| 296 | Neu5Ac $\alpha$ 2-6Gal $\beta$ 1-4Glc $\beta$ -sp4                                               | 6'SL                   | 360   | 96   | 0  |
| 297 | Neu5Ac $\beta$ 2-6Gal $\beta$ 1-4Glc $\beta$ -sp2                                                |                        | 1645  | 409  | 3  |
| 298 | Neu5Ac $\alpha$ 2-3Gal $\beta$ 1-4GlcNAc $\beta$ -sp3                                            | 3'SLN                  | 5486  | 1855 | 3  |
| 299 | Neu5Ac $\alpha$ 2-3Gal $\beta$ 1-3GlcNAc $\beta$ -sp3                                            | 3'SiaLe <sup>C</sup>   | 3968  | 1266 | 6  |
| 300 | Neu5Ac $\alpha$ 2-6Gal $\beta$ 1-4GlcNAc $\beta$ -sp3                                            | 6'SLN                  | 936   | 527  | 1  |
| 302 | Neu5Ac $\beta$ 2-6Gal $\beta$ 1-4GlcNAc $\beta$ -sp3                                             |                        | 1100  | 368  | 2  |
| 303 | Neu5Gc $\alpha$ 2-3Gal $\beta$ 1-4GlcNAc $\beta$ -sp3                                            |                        | 2147  | 451  | 1  |
| 304 | Neu5Gc $\alpha$ 2-6Gal $\beta$ 1-4GlcNAc $\beta$ -sp3                                            |                        | 792   | 191  | 0  |
| 305 | Neu5Gc $\beta$ 2-6Gal $\beta$ 1-4GlcNAc $\beta$ -sp3                                             |                        | 601   | 112  | 0  |
| 306 | 9-Nac-Neu5Ac $\alpha$ 2-6Gal $\beta$ 1-4GlcNAc $\beta$ -sp3                                      |                        | 1431  | 437  | 1  |
| 307 | KDN $\alpha$ 2-3Gal $\beta$ 1-3GlcNAc $\beta$ -sp2                                               |                        | 1441  | 304  | 2  |
| 308 | KDN $\alpha$ 2-3Gal $\beta$ 1-4GlcNAc $\beta$ -sp2                                               |                        | 903   | 204  | 0  |
| 309 | Neu5Ac $\alpha$ 2-6(Neu5Ac $\alpha$ 2-3)GalNAc $\alpha$ -sp3                                     |                        | 487   | 107  | 1  |
| 310 | 3'SiaLacNAc $\beta$ -OCH <sub>2</sub> CH <sub>2</sub> CH <sub>2</sub> NH-(3'SiaLacNAc-amide-sp3) |                        | 1932  | 665  | 1  |
| 315 | Neu5Ac $\alpha$ 2-3Gal $\beta$ 1-4-(6-O-Su)GlcNAc $\beta$ -sp3                                   |                        | 1930  | 477  | 3  |
| 316 | Neu5Ac $\alpha$ 2-3Gal $\beta$ 1-3-(6-O-Su)GlcNAc $\beta$ -sp3                                   |                        | 2752  | 1014 | 5  |
| 318 | Neu5Ac $\alpha$ 2-6Gal $\beta$ 1-4-(6-O-Su)GlcNAc $\beta$ -sp3                                   |                        | 1004  | 234  | 1  |
| 319 | Neu5Ac $\alpha$ 2-3-(6-O-Su)Gal $\beta$ 1-4GlcNAc $\beta$ -sp3                                   |                        | 7963  | 705  | 7  |
| 320 | 4-O-Su-Neu5Ac $\alpha$ 2-3-(6-O-Su)Gal $\beta$ 1-4GlcNAc $\beta$ -sp3                            |                        | 9621  | 1580 | 10 |
| 321 | (Neu5Ac $\alpha$ 2-8) <sub>3</sub> -sp3                                                          | (Sia) <sub>3</sub>     | 226   | 57   | 0  |



|     |                                                                                       |                             |       |      |    |
|-----|---------------------------------------------------------------------------------------|-----------------------------|-------|------|----|
| 322 | (Neu5Ac $\alpha$ 2-8) $\beta$ 3-sp3                                                   |                             | 553   | 112  | 0  |
| 323 | Neu5Ac $\alpha$ 2-6Gal $\beta$ 1-3GlcNAc-sp3                                          | 6'-SiaLe <sup>c</sup>       | 317   | 100  | 0  |
| 324 | Neu5Ac $\alpha$ 2-6Gal $\beta$ 1-3(6-O-Su)GlcNAc-sp3                                  |                             | 361   | 80   | 0  |
| 325 | Neu5Ac $\alpha$ 2-3Gal $\beta$ 1-4Glc $\beta$ -dipeptide                              |                             | 275   | 57   | 0  |
| 326 | Neu5Ac $\alpha$ 2-3Gal $\beta$ 1-4Glc $\beta$ -dipeptide                              |                             | 311   | 65   | 0  |
| 327 | Neu5Ac $\alpha$ 2-3Gal $\beta$ 1-4Glc $\beta$ -dipeptide                              |                             | 495   | 125  | 0  |
| 328 | Neu5Ac $\alpha$ 2-3Gal $\beta$ 1-4Glc $\beta$ -dipeptide                              |                             | 298   | 55   | 0  |
| 329 | Neu5Ac $\alpha$ 2-3Gal $\beta$ 1-4Glc $\beta$ -dipeptide                              |                             | 586   | 133  | 0  |
| 331 | Neu5Gc $\alpha$ 2-3Gal $\beta$ 1-3GlcNAc $\beta$ -sp3                                 |                             | 2552  | 467  | 5  |
| 332 | Neu5Ac $\alpha$ 2-3Gal $\beta$ 1-4Glc $\beta$ -dipeptide                              |                             | 381   | 91   | 0  |
| 333 | Neu5Gc $\alpha$ 2-3Gal $\beta$ 1-3-(6-O-Su)GlcNAc $\beta$ -sp3                        |                             | 4811  | 1109 | 5  |
| 334 | Neu5Gc $\alpha$ 2-3Gal $\beta$ 1-4-(6-O-Su)GlcNAc $\beta$ -sp3                        |                             | 1639  | 274  | 2  |
| 335 | Neu5Ac $\alpha$ 2-3Gal $\beta$ 1-3-(6-O-Su)GlcNAc $\beta$ -sp3                        |                             | 6401  | 1102 | 6  |
| 336 | $\alpha$ Kdo-(2 $\rightarrow$ 8)- $\alpha$ Kdo-(2 $\rightarrow$ 4)- $\alpha$ Kdo-sp11 |                             | 5921  | 1649 | 10 |
| 337 | GalNAc $\alpha$ 1-4Gal $\beta$ 1-4GlcNAc $\beta$ -sp3                                 |                             | 4219  | 657  | 7  |
| 338 | Neu5Ac $\alpha$ 2-6Gal $\beta$ 1-3GalNAc $\alpha$ -sp3                                |                             | 306   | 59   | 0  |
| 339 | Neu5Ac $\beta$ 2-6Gal $\beta$ 1-3GalNAc $\alpha$ -sp3                                 |                             | 1931  | 365  | 3  |
| 340 | Gal $\alpha$ 1-3(Neu5Ac $\beta$ 2-6)GalNAc $\beta$ -sp3                               |                             | 2907  | 760  | 4  |
| 341 | Neu5Ac $\alpha$ 2-3-(6-Su)Gal $\beta$ 1-4GlcNAc $\beta$ -sp2                          |                             | 5964  | 1255 | 9  |
| 359 | Gal $\alpha$ 1-3(Fuc $\alpha$ 1-2)Gal $\beta$ 1-3GlcNAc $\beta$ -sp3                  | B (type 1)                  | 400   | 112  | 0  |
| 360 | Gal $\alpha$ 1-3(Fuc $\alpha$ 1-2)Gal $\beta$ 1-4GlcNAc $\beta$ -sp3                  | B (type 2)                  | 5071  | 644  | 6  |
| 362 | Gal $\alpha$ 1-3(Fuc $\alpha$ 1-2)Gal $\beta$ 1-3GalNAc $\alpha$ -sp3                 | B (type 3)                  | 8283  | 2150 | 14 |
| 363 | Gal $\alpha$ 1-3(Fuc $\alpha$ 1-2)Gal $\beta$ 1-3GalNAc $\beta$ -sp3                  | B (type 4)                  | 2728  | 589  | 6  |
| 364 | Gal $\alpha$ 1-3Gal $\beta$ 1-4(Fuc $\alpha$ 1-3)GlcNAc $\beta$ -sp3                  | $\alpha$ GalLe <sup>x</sup> | 541   | 116  | 0  |
| 365 | Gal $\alpha$ 1-4(Fuc $\alpha$ 1-2)Gal $\beta$ 1-4GlcNAc $\beta$ -sp3                  |                             | 962   | 361  | 1  |
| 366 | GalNAc $\alpha$ 1-3(Fuc $\alpha$ 1-2)Gal $\beta$ 1-3GlcNAc $\beta$ -sp3               | A (type 1)                  | 351   | 71   | 0  |
| 368 | GalNAc $\alpha$ 1-3(Fuc $\alpha$ 1-2)Gal $\beta$ 1-4GlcNAc $\beta$ -sp3               | A (type 2)                  | 2621  | 625  | 2  |
| 369 | GalNAc $\alpha$ 1-4(Fuc $\alpha$ 1-2)Gal $\beta$ 1-4GlcNAc $\beta$ -sp3               |                             | 3246  | 374  | 3  |
| 370 | Crypted                                                                               | Crypted                     | 2629  | 835  | 3  |
| 371 | Fuc $\alpha$ 1-2Gal $\beta$ 1-3(Fuc $\alpha$ 1-4)GlcNAc $\beta$ -sp3                  | Le <sup>B</sup>             | 307   | 107  | 0  |
| 372 | Fuc $\alpha$ 1-2Gal $\beta$ 1-4(Fuc $\alpha$ 1-3)GlcNAc $\beta$ -sp3                  | Le <sup>Y</sup>             | 3936  | 1040 | 8  |
| 373 | Gal $\alpha$ 1-3Gal $\beta$ 1-4GlcNAc $\beta$ 1-3Gal $\beta$ -sp3                     | Galili (tetra)              | 777   | 128  | 0  |
| 374 | Gal $\alpha$ 1-3(Gal $\alpha$ 1-4)Gal $\beta$ 1-4GlcNAc $\beta$ -sp3                  | Gal $\alpha$ 2-3',4'LN      | 280   | 72   | 0  |
| 375 | Gal $\alpha$ 1-4GlcNAc $\beta$ 1-3Gal $\beta$ 1-4GlcNAc $\beta$ -sp3                  |                             | 1032  | 190  | 1  |
| 377 | Gal $\beta$ 1-3GlcNAc $\beta$ 1-3Gal $\beta$ 1-3GlcNAc $\beta$ -sp2                   |                             | 827   | 166  | 1  |
| 378 | Gal $\beta$ 1-3GlcNAc $\alpha$ 1-3Gal $\beta$ 1-4GlcNAc $\beta$ -sp3                  |                             | 10106 | 2009 | 9  |
| 379 | Gal $\beta$ 1-3GlcNAc $\beta$ 1-3Gal $\beta$ 1-4GlcNAc $\beta$ -sp3                   |                             | 1304  | 387  | 1  |

Supplementary Material

|     |                                               |                        |       |      |    |
|-----|-----------------------------------------------|------------------------|-------|------|----|
| 380 | Galβ1-3GlcNAcα1-6Galβ1-4GlcNAcβ-sp2           |                        | 2306  | 344  | 1  |
| 381 | Galβ1-3GlcNAcβ1-6Galβ1-4GlcNAcβ-sp2           |                        | 2581  | 827  | 3  |
| 382 | Galβ1-3GalNAcβ1-4Galβ1-4Glcβ-sp3              | GA1, asialo-GM1        | 642   | 125  | 0  |
| 383 | Galβ1-4GlcNAcβ1-3Galβ1-4Glcβ-sp4              | LNnT                   | 280   | 74   | 0  |
| 384 | Galβ1-4GlcNAcβ1-3Galβ1-4GlcNAcβ-sp2           | i                      | 290   | 76   | 0  |
| 386 | Galβ1-4GlcNAcα1-6Galβ1-4GlcNAcβ-sp2           |                        | 3822  | 638  | 2  |
| 387 | Galβ1-4GlcNAcβ1-6Galβ1-4GlcNAcβ-sp2           |                        | 2719  | 521  | 2  |
| 388 | Galβ1-4GlcNAcβ1-6(Galβ1-3)GalNAcα-sp3         |                        | 229   | 77   | 0  |
| 389 | GalNAcβ1-3Galα1-4Galβ1-4Glcβ-sp3              | Gb4, P                 | 399   | 90   | 0  |
| 390 | (Glcα1-4) <sub>4</sub> β-sp4                  | maltotetraose          | 13504 | 2947 | 10 |
| 394 | GlcNAcβ1-4<br>Galβ1-4GlcNAcβ-sp2              |                        | 2286  | 487  | 3  |
|     | GlcNAcβ1-3                                    |                        |       |      |    |
| 395 | GlcNAcβ1-6(GlcNAcβ1-3)Galβ1-4GlcNAcβ-sp2      | T <sub>k</sub>         | 1249  | 316  | 0  |
| 396 | (GlcNAcβ1) <sub>3</sub> -3,4,6-GalNAcα-sp3    |                        | 4966  | 727  | 4  |
| 397 | (GlcNAcβ1) <sub>3</sub> -3,4,6-GalNAcα-sp3    |                        | 7793  | 1480 | 9  |
| 398 | Galβ1-3GlcN(Fm)β1-3Galβ1-4GlcNAcβ-sp3         |                        | 557   | 106  | 0  |
| 399 | Galβ1-3GlcNAcα1-3Galβ1-3GlcNAcβ-sp2           |                        | 6788  | 1178 | 10 |
| 401 | Galβ1-3GlcNAcβ1-3Galβ1-3GlcNAcβ-sp3           |                        | 717   | 181  | 0  |
| 402 | GalNAcα1-3<br>Galα1-4GlcNAcβ-sp3              |                        | 175   | 45   | 0  |
|     | Fucα1-2                                       |                        |       |      |    |
| 403 | Galβ1-3GlcNAcβ1-3Galβ1-4GlcNAcβ-sp2           |                        | 2047  | 376  | 4  |
| 404 | GalNAcα1-3Galβ1-4(Fucα1-3)GlcNAcβ-sp3         | αGalNAcLe <sup>x</sup> | 3611  | 1529 | 5  |
| 405 | Galα1-3(Fucα1-2)Galα1-4GlcNAcβ-sp3            |                        | 2929  | 227  | 1  |
| 406 | GalNAcα1-3(Fucα1-2)Galα1-3GalNAcβ-sp3         |                        | 304   | 60   | 0  |
| 419 | 3-O-SuGalβ1-4GlcNAcβ1-3Galβ1-4GlcNAcβ-sp3     |                        | 2425  | 448  | 3  |
| 420 | 4-O-SuGalβ1-4GlcNAcβ1-3Galβ1-4GlcNAcβ-sp3     |                        | 894   | 183  | 1  |
| 423 | Neu5Acα2-3Galβ1-4(Fucα1-3)GlcNAcβ-sp3         | SiaLe <sup>x</sup>     | 1673  | 483  | 1  |
| 425 | Neu5Acα2-3Galβ1-4<br>GlcNAcβ-sp3              |                        | 2164  | 673  | 2  |
|     | Fucβ1-3                                       |                        |       |      |    |
| 426 | Neu5Acα2-3Galβ1-3(Fucα1-4)GlcNAcβ-sp3         | SiaLe <sup>A</sup>     | 216   | 60   | 0  |
| 428 | Neu5Acα2-3Galβ1-4(Fucα1-3)(6-O-Su)GlcNAcβ-sp3 | 6-OSu-SLe <sup>x</sup> | 429   | 149  | 0  |

|     |                                                                                                                           |                           |       |      |    |
|-----|---------------------------------------------------------------------------------------------------------------------------|---------------------------|-------|------|----|
| 429 | Neu5Ac $\alpha$ 2-3(6-O-Su)Gal $\beta$ 1-4(Fuc $\alpha$ 1-3)GlcNAc $\beta$ -sp3                                           | 6'-OSu-SiaLe <sup>x</sup> | 762   | 222  | 2  |
| 431 | Neu5Ac $\alpha$ 2-3Gal $\beta$ 1-4(2-O-Su-Fuc $\alpha$ 1-3)GlcNAc $\beta$ -sp3                                            |                           | 918   | 242  | 2  |
| 432 | Neu5Ac $\alpha$ 2-3Gal $\beta$ 1-4<br>GlcNAc $\beta$ -sp3<br>3-O-Su-Fuc $\alpha$ 1-3                                      |                           | 546   | 207  | 0  |
| 433 | Neu5Ac $\alpha$ 2-6(Neu5Ac $\alpha$ 2-3Gal $\beta$ 1-3)GalNAc $\alpha$ -sp3                                               |                           | 203   | 66   | 0  |
| 434 | Neu5Ac $\alpha$ 2-8Neu5Ac $\alpha$ 2-3Gal $\beta$ 1-4Glc $\beta$ -sp4                                                     | GD3                       | 287   | 84   | 0  |
| 435 | Neu5Ac $\alpha$ 2-3Gal $\beta$ 1-4(2-O-Su-Fuc $\alpha$ 1-3)(6-O-Su)GlcNAc $\beta$ -sp3                                    |                           | 425   | 133  | 0  |
| 436 | 4-O-Su-Neu5Ac $\alpha$ 2-3Gal $\beta$ 1-4(Fuc $\alpha$ 1-3)(6-O-Su)GlcNAc $\beta$ -sp3                                    |                           | 963   | 415  | 2  |
| 437 | GalNAc $\alpha$ 1-3(Fuc $\alpha$ 1-2)Gal $\beta$ 1-3GalNAc $\beta$ -sp3                                                   | A(type 4)                 | 33886 | 3193 | 18 |
| 438 | Fuc $\beta$ 1-2Gal $\beta$ 1-4(Fuc $\alpha$ 1-3)GlcNAc $\beta$ -sp3                                                       |                           | 460   | 131  | 0  |
| 439 | $\alpha$ Kdo-(2 $\rightarrow$ 4)- $\alpha$ Kdo-(2 $\rightarrow$ 4)- $\alpha$ Kdo-(2 $\rightarrow$ 6)- $\beta$ GlcNAc-sp11 |                           | 5179  | 1212 | 9  |
| 440 | Neu5Ac $\beta$ 2-6(Fuc $\alpha$ 1-2)Gal $\beta$ 1-4GlcNAc $\beta$ -sp3                                                    |                           | 2150  | 416  | 3  |
| 441 | Neu5Ac $\alpha$ 2-6(Fuc $\alpha$ 1-2)Gal $\beta$ 1-4GlcNAc $\beta$ -sp3                                                   |                           | 719   | 160  | 1  |
| 442 | Neu5Ac $\alpha$ 2-3 (GalNAc $\beta$ 1-4)Gal $\beta$ 1-4Glc $\beta$ -sp4                                                   | GM2                       | 499   | 111  | 0  |
| 479 | Fuc $\alpha$ 1-2Gal $\beta$ 1-3GlcNAc $\beta$ 1-3Gal $\beta$ 1-4Glc $\beta$ -sp4                                          | LNFP I                    | 512   | 286  | 0  |
| 480 | Fuc $\alpha$ 1-2Gal $\beta$ 1-3GlcNAc $\beta$ 1-3Gal $\beta$ 1-4GlcNAc $\beta$ -sp2                                       | H(type 1) penta           | 3826  | 911  | 8  |
| 481 | Gal $\alpha$ 1-3Gal $\beta$ 1-4GlcNAc $\beta$ 1-3Gal $\beta$ 1-4Glc $\beta$ -sp4                                          | Galili (penta)            | 241   | 60   | 0  |
| 482 | Gal $\alpha$ 1-3(Fuc $\alpha$ 1-2)Gal $\beta$ 1-3(Fuc $\alpha$ 1-4)GlcNAc $\beta$ -sp3                                    | BL <sup>eB</sup>          | 1726  | 229  | 3  |
| 483 | Gal $\alpha$ 1-3(Fuc $\alpha$ 1-2)Gal $\beta$ 1-4(Fuc $\alpha$ 1-3)GlcNAc $\beta$ -sp3                                    | BL <sup>eY</sup>          | 2689  | 293  | 3  |
| 484 | GalNAc $\alpha$ 1-3(Fuc $\alpha$ 1-2)Gal $\beta$ 1-3(Fuc $\alpha$ 1-4)GlcNAc $\beta$ -sp3                                 | AL <sup>eB</sup>          | 175   | 49   | 0  |
| 485 | Gal $\beta$ 1-4GalNAc $\alpha$ 1-3(Fuc $\alpha$ 1-2)Gal $\beta$ 1-4GlcNAc $\beta$ -sp3                                    |                           | 2643  | 642  | 4  |
| 488 | Gal $\beta$ 1-4GlcNAc $\beta$ 1-6(Gal $\beta$ 1-4GlcNAc $\beta$ 1-3)GalNAc $\alpha$ -sp3                                  |                           | 284   | 69   | 0  |
| 489 | Gal $\beta$ 1-4GlcNAc $\beta$ 1-3(GlcNAc $\beta$ 1-6)Gal $\beta$ 1-4GlcNAc $\beta$ -sp2                                   |                           | 541   | 172  | 0  |
| 490 | Gal $\beta$ 1-4GlcNAc $\beta$ 1-6(GlcNAc $\beta$ 1-3)Gal $\beta$ 1-4GlcNAc $\beta$ -sp2                                   |                           | 527   | 119  | 0  |
| 491 | GalNAc $\alpha$ 1-3(Fuc $\alpha$ 1-2)Gal $\beta$ 1-4(Fuc $\alpha$ 1-3)GlcNAc $\beta$ -sp3                                 | AL <sup>eY</sup>          | 213   | 65   | 0  |
| 492 | (Glc $\alpha$ 1-6) <sub>5</sub> $\beta$ -sp4                                                                              | isomaltopentaose          | 1151  | 263  | 2  |
| 493 | (GlcNAc $\beta$ 1-4) <sub>5</sub> $\beta$ -sp4                                                                            | chitopentaose             | 1798  | 509  | 1  |
| 495 | Man $\alpha$ 1-6(Man $\alpha$ 1-3)Man $\alpha$ 1-6(Man $\alpha$ 1-3)Man $\beta$ -sp4                                      | Man <sub>5</sub>          | 892   | 319  | 1  |

Supplementary Material

|     |                                                                       |                          |      |     |   |
|-----|-----------------------------------------------------------------------|--------------------------|------|-----|---|
| 496 | Fuca1-2Galβ1-3(Fuca1-4)GlcNAcβ1-3Galβ1-4Glcβ-sp4                      | Le <sup>b</sup> (hexa)   | 223  | 72  | 0 |
| 497 | Fuca1-2Galβ1-4(Fuca1-3)GlcNAcβ1-3Galβ1-4Glcβ-sp4                      | Le <sup>Y</sup> (hexa)   | 2057 | 212 | 4 |
| 498 | Galβ1-4GlcNAcβ1-3Galβ1-4GlcNAcβ1-3Galβ1-4GlcNAcβ-sp3                  | (LN) <sub>3</sub>        | 201  | 62  | 0 |
| 499 | Galβ1-4GlcNAcβ1-6(Galβ1-4GlcNAcβ1-3)Galβ1-4GlcNAcβ-sp2                | I                        | 200  | 45  | 0 |
| 501 | Galβ1-3GalNAcβ1-3Galα1-4Galβ1-4Glcβ-sp4                               | Gb5                      | 1360 | 254 | 1 |
| 502 | (Glcα1-6) <sub>6</sub> β-sp4                                          | maltohexaose             | 3033 | 653 | 5 |
| 503 | (GlcNAcβ1-4) <sub>6</sub> -sp4                                        | chitohexaose             | 2396 | 314 | 1 |
| 504 | (A-GN-M) <sub>2</sub> -3,6-M-GN-GNβ-sp4                               | 9-OS                     | 200  | 57  | 0 |
| 505 | (GN-M) <sub>2</sub> -3,6-M-GN-GNβ-sp4                                 | 7-OS                     | 728  | 195 | 0 |
| 506 | Araf6                                                                 | Ara6                     | 158  | 37  | 0 |
| 507 | GalNAcα1-3GalNAcβ1-3Galα1-4Galβ1-4Glcβ-sp3                            | Fs-5                     | 2021 | 988 | 3 |
| 508 | GalNAcβ1-3(Fuca1-2)Galβ1-4(Fuca1-3)GlcNAcβ-sp3                        |                          | 402  | 93  | 0 |
| 509 | Galβ1-3GalNAcβ1-4(Neu5Acα2-3)Galβ1-4Glcβ-sp4                          | GM1                      | 1553 | 448 | 3 |
| 527 | Neu5Acα2-3Galβ1-4GlcNAcβ1-3Galβ1-4GlcNAcβ-sp2                         |                          | 179  | 48  | 0 |
| 528 | Neu5Acα2-3Galβ1-4(Fuca1-3)GlcNAcβ1-3Galβ-sp3                          | SiaLe <sup>x</sup> -3Gal | 203  | 49  | 0 |
| 529 | Neu5Acα2-6(Galβ1-3)GlcNAcβ1-3Galβ1-4Glcβ-sp4                          | LSTb                     | 297  | 70  | 0 |
| 530 | (Neu5Acα2-3Galβ1)2-3,4-GlcNAcβ-sp3                                    |                          | 1529 | 352 | 1 |
| 531 | Neu5Acα2-8Neu5Acα2-3(GalNAcβ1-4)Galβ1-4Glcβ-sp2                       | GD2                      | 434  | 116 | 0 |
| 534 | Neu5Acα2-3Galβ1-4GlcNAcβ1-3Galβ1-4GlcNAcβ-sp3                         |                          | 193  | 58  | 0 |
| 535 | Neu5Acα2-8Neu5Acα2-3(GalNAcβ1-4)Galβ1-4Glc-sp4                        | GD2                      | 234  | 61  | 0 |
| 536 | Neu5Acα2-3Galβ1-3GlcNAcβ1-3Galβ1-4Glcβ-sp4                            | LSTa                     | 342  | 92  | 0 |
| 537 | Neu5Acα2-3Galβ1-4GlcNAcβ1-3Galβ1-4Glcβ-sp4                            | LSTd                     | 202  | 61  | 0 |
| 538 | Galβ1-4(Fuca1-3)GlcNAcβ1-6(Galβ1-3GlcNAcβ1-3)Galβ1-4Glcβ-sp4          | MFLNH III                | 2473 | 712 | 3 |
| 539 | Galβ1-4GlcNAcβ1-6(Fuca1-2Galβ1-3GlcNAcβ1-3)Galβ1-4Glcβ-sp4            | MFLNH I                  | 780  | 239 | 0 |
| 540 | Galβ1-4(Fuca1-3)GlcNAcβ1-6(Neu5Ac2-6Galβ1-4GlcNAcβ1-3)Galβ1-4Glcβ-sp4 | MSMFLNnH                 | 2262 | 337 | 3 |

|     |                                                                                                                                  |                                 |       |      |    |
|-----|----------------------------------------------------------------------------------------------------------------------------------|---------------------------------|-------|------|----|
| 541 | Galβ1-4(Fucα1-3)GlcNAcβ1-6(Fucα1-2Galβ1-3GlcNAcβ1-3)Galβ1-4Glcβ-sp4                                                              | DFLNH (a)                       | 6347  | 878  | 7  |
| 542 | Galβ1-3GlcNAcβ1-3Galβ1-4(Fucα1-3)GlcNAcβ1-6(Galβ1-3GlcNAcβ1-3)Galβ1-4Glcβ-sp4                                                    | MF(1-3)iLNO                     | 2867  | 344  | 6  |
| 543 | Fucα1-2Galβ1-3(Fucα1-4)GlcNAcβ1-3[Galβ1-4(Fucα1-3)GlcNAcβ1-6]Galβ1-4Glcβ-sp4                                                     | TFLNH                           | 3573  | 657  | 6  |
| 545 | αKdo-(2→8)-αKdo-(2→4)-αKdo-(2→6)-βGlcNAc-(1→6)αGlcNAc-sp11                                                                       |                                 | 3329  | 757  | 6  |
| 625 | (GlcAβ1-4GlcNAcβ1-3) <sub>11-12</sub> -NH <sub>2</sub> -ol                                                                       | hyaluronic acid                 | 776   | 257  | 1  |
| 627 | (Sia2-6A-GN-M) <sub>2</sub> -3,6-M-GN-GNβ-sp4                                                                                    | 11-OS, YDS                      | 184   | 54   | 0  |
| 629 | Trehalose-ethanolamine                                                                                                           | <b>negative control</b>         | 323   | 71   | 0  |
| 630 | (GlcAβ1-3GlcNAcβ1-4) <sub>20</sub> -NH( <i>p</i> -C <sub>6</sub> H <sub>4</sub> )CH <sub>2</sub> CH <sub>2</sub> NH <sub>2</sub> | hyaluronic acid , 8kDa          | 921   | 236  | 1  |
| 631 | (GlcAβ1-3GlcNAcβ1-4) <sub>38</sub> -NH( <i>p</i> -C <sub>6</sub> H <sub>4</sub> )CH <sub>2</sub> CH <sub>2</sub> NH <sub>2</sub> | hyaluronic acid, 15-30kDa       | 456   | 174  | 1  |
| 632 | (GlcAβ1-3GlcNAcβ1-4) <sub>13</sub> -NH( <i>p</i> -C <sub>6</sub> H <sub>4</sub> )CH <sub>2</sub> CH <sub>2</sub> NH <sub>2</sub> | hyaluronic acid, 4-8kDa         | 481   | 109  | 0  |
| 800 | GlcNAcα1-4GlcNAcβ-sp3                                                                                                            |                                 | 1697  | 257  | 1  |
| 801 | GalNAcα1-3GalNAc(fur)β-sp3                                                                                                       |                                 | 3988  | 289  | 2  |
| 802 | Galβ1-3GalNAc(fur)β-sp3                                                                                                          |                                 | 51348 | 2324 | 20 |
| 804 | [Galβ1-4GlcNAcβ-OCH <sub>2</sub> CH <sub>2</sub> ] <sub>2</sub> NH                                                               | LN dimer                        | 908   | 252  | 1  |
| 805 | GalNAcβ1-4(6-O-Bn)GlcNAcβ-sp3                                                                                                    |                                 | 6754  | 1034 | 11 |
| 806 | Galα1-6Glcα-sp3                                                                                                                  | α-melibiose                     | 5469  | 949  | 4  |
| 807 | GlcNAcβ1-4GlcNAcα-sp4                                                                                                            |                                 | 10158 | 984  | 8  |
| 808 | Galα1-6Glcβ-sp3                                                                                                                  | melibiose                       | 9724  | 1131 | 7  |
| 809 | GalNAcβ1-3GalNAcα-sp3                                                                                                            |                                 | 8521  | 1509 | 13 |
| 810 | GalNGcα1-3GalNAcα-sp3                                                                                                            | core 5(Gc)                      | 328   | 76   | 0  |
| 850 | Galβ1-3(6-O-Su)GalNAcα-sp3                                                                                                       | 6-SuTF                          | 341   | 102  | 0  |
| 851 | Galα1-3(6-O-Su)GalNAcα-sp3                                                                                                       | 6-SuT <sub>αα</sub>             | 267   | 86   | 0  |
| 852 | GlcNAcβ1-4-[HOOC(CH <sub>3</sub> )CH]-3-O-GlcNAcα-sp4                                                                            | GlcNAc-Murα                     | 1056  | 322  | 1  |
| 900 | H-(Gly) <sub>6</sub> -NH <sub>2</sub> Gly6-amide, linear                                                                         | Gly <sub>6</sub> -amide, linear | 25036 | 2262 | 16 |
| 901 | biot-CMG <sub>2</sub> -NH <sub>2</sub>                                                                                           | <b>biot-CMG<sub>2</sub></b>     | 52213 | 3728 | 20 |
| 902 | Peptide, crypted                                                                                                                 |                                 | 5630  | 1228 | 6  |
| 903 | Peptide, crypted                                                                                                                 |                                 | 2617  | 897  | 4  |
| 904 | Peptide, crypted                                                                                                                 |                                 | 6111  | 1154 | 12 |
| 905 | Suc-LPWYRAPK-NH <sub>2</sub>                                                                                                     | RhD                             | 16175 | 3630 | 20 |
| 906 | Peptide, crypted                                                                                                                 |                                 | 475   | 163  | 0  |
| 907 | Peptide, crypted                                                                                                                 |                                 | 457   | 93   | 0  |
| 908 | Peptide, crypted                                                                                                                 |                                 | 6687  | 2162 | 13 |
| 909 | Peptide, crypted                                                                                                                 |                                 | 812   | 166  | 1  |

## Supplementary Material

|     |                                          |      |      |    |
|-----|------------------------------------------|------|------|----|
| 910 | Npentyl-Indol-linked-3-NH2 (AcOH salt)   | 686  | 168  | 0  |
| 911 | N-C5-indazole-3-CONH-PEG-NH2 (AcOH salt) | 6037 | 1212 | 11 |

sp2 = -O(CH<sub>2</sub>)<sub>2</sub>NH<sub>2</sub>

sp3 = -O(CH<sub>2</sub>)<sub>3</sub>NH<sub>2</sub>

sp4 = -NHCOCH<sub>2</sub>NH<sub>2</sub>

sp5 = -O(CH<sub>2</sub>)<sub>3</sub>NH-CO(CH<sub>2</sub>)<sub>5</sub>NH<sub>2</sub>

sp8 = -(OCH<sub>2</sub>CH<sub>2</sub>)<sub>6</sub>NH<sub>2</sub>

**Table S2.** List of glycans, their binding to human circulating IgM and IgG antibodies (n=11), expressed in relative fluorescence units (RFU) as median, and the number of human donors exceeding *cut off* ( $\geq 4000$  RFU).

| Glycan ID (#) | Structure                                                             | Common Name         | IgG    |                 | IgM    |                 |
|---------------|-----------------------------------------------------------------------|---------------------|--------|-----------------|--------|-----------------|
|               |                                                                       |                     | Median | $\geq 4000$ RFU | Median | $\geq 4000$ RFU |
| 001           | Fuc $\alpha$ -sp3                                                     |                     | 677    | 0               | 1296   | 0               |
| 002           | Gal $\alpha$ -sp3                                                     |                     | 1965   | 1               | 2752   | 3               |
| 003           | Gal $\beta$ -sp3                                                      |                     | 1466   | 0               | 7190   | 5               |
| 004           | GalNAc $\alpha$ 1-OSer                                                | T <sub>n</sub> -Ser | 1185   | 0               | 2657   | 2               |
| 005           | GalNAc $\alpha$ -sp3                                                  | T <sub>n</sub>      | 1332   | 0               | 6289   | 5               |
| 006           | GalNAc $\beta$ -sp3                                                   |                     | 4194   | 2               | 3882   | 4               |
| 007           | Glc $\alpha$ -sp3                                                     |                     | 1168   | 0               | 1139   | 1               |
| 009           | Glc $\beta$ -sp3                                                      |                     | 1062   | 0               | 2063   | 1               |
| 010           | GlcNAc $\beta$ -sp3                                                   |                     | 1966   | 1               | 8507   | 6               |
| 011           | GlcNAc $\beta$ -sp2                                                   |                     | 1608   | 1               | 6700   | 6               |
| 012           | GlcNAc $\beta$ -sp7                                                   |                     | 1340   | 0               | 1928   | 1               |
| 013           | GlcNAc $\beta$ -sp8                                                   |                     | 2628   | 1               | 6422   | 7               |
| 014           | GlcN(Gc) $\beta$ -sp4                                                 |                     | 904    | 0               | 1840   | 1               |
| 015           | HOCH <sub>2</sub> (HOCH) <sub>4</sub> CH <sub>2</sub> NH <sub>2</sub> | aminoglucitol       | 265    | 0               | 484    | 0               |
| 016           | Man $\alpha$ -sp3                                                     |                     | 306    | 0               | 664    | 1               |
| 017           | Man $\alpha$ -sp4                                                     |                     | 1341   | 1               | 1741   | 1               |
| 018           | Man $\beta$ -sp4                                                      |                     | 761    | 0               | 1526   | 1               |
| 019           | ManNAc $\beta$ -sp4                                                   |                     | 9491   | 10              | 15659  | 10              |
| 020           | Rha $\alpha$ -sp3                                                     |                     | 3789   | 4               | 24247  | 9               |
| 021           | Gal $\beta$ -sp4                                                      |                     | 1937   | 2               | 1794   | 1               |
| 022           | GlcNAc $\beta$ -sp4                                                   |                     | 845    | 0               | 708    | 0               |
| 023           | GalNAc $\beta$ -sp4                                                   |                     | 931    | 0               | 1968   | 1               |
| 024           | GlcNAc $\alpha$ -sp3                                                  |                     | 6362   | 11              | 7471   | 7               |
| 025           | GalNAc $\beta$ -sp10                                                  |                     | 6646   | 3               | 4555   | 4               |
| 026           | Rha $\beta$ -sp4                                                      |                     | 7144   | 3               | 9334   | 5               |
| 027           | 3,6-O-Me <sub>2</sub> -Glc $\beta$ -sp3                               | DMG                 | 2903   | 2               | 5166   | 4               |
| 028           | Xyl $\beta$ -sp4                                                      |                     | 846    | 0               | 1315   | 1               |
| 029           | Fuc $\beta$ -sp4                                                      |                     | 965    | 0               | 2059   | 2               |
| 030           | Glc $\beta$ -sp4                                                      |                     | 1104   | 0               | 1900   | 1               |
| 031           | L-Ara $\alpha$ -sp4                                                   |                     | 1167   | 0               | 1622   | 1               |
| 032           | GalN(Gc) $\beta$ -sp3                                                 |                     | 840    | 0               | 2565   | 3               |
| 037           | 3-O-Su-Gal $\beta$ -sp3                                               |                     | 845    | 0               | 805    | 0               |

## Supplementary Material

|     |                                                    |                                                           |       |   |       |   |
|-----|----------------------------------------------------|-----------------------------------------------------------|-------|---|-------|---|
| 038 | 3-O-Su-GalNAc $\beta$ -sp3                         |                                                           | 2656  | 3 | 2252  | 2 |
| 041 | 6-O-Su-GalNAc $\alpha$ -sp3                        |                                                           | 2630  | 1 | 7916  | 6 |
| 043 | 6-O-Su-GlcNAc $\beta$ -sp3                         |                                                           | 4577  | 1 | 5463  | 5 |
| 044 | GlcA $\alpha$ -sp3                                 | $\alpha$ -<br>glucuronic<br>acid                          | 1237  | 0 | 2251  | 2 |
| 045 | GlcA $\beta$ -sp3                                  | $\beta$ -<br>glucuronic<br>acid, $\beta$ -<br>glucuronate | 701   | 0 | 2263  | 1 |
| 046 | 6-H <sub>2</sub> PO <sub>3</sub> Glc $\beta$ -sp4  | Glc6P                                                     | 1058  | 0 | 2567  | 2 |
| 047 | 6-H <sub>2</sub> PO <sub>3</sub> Man $\alpha$ -sp3 | Man6P                                                     | 838   | 0 | 1269  | 1 |
| 048 | Neu5Ac $\alpha$ -sp3                               |                                                           | 549   | 0 | 693   | 0 |
| 049 | Neu5Ac $\alpha$ -sp9                               |                                                           | 744   | 0 | 1206  | 1 |
| 050 | Neu5Ac $\beta$ -sp3                                |                                                           | 913   | 0 | 3326  | 3 |
| 051 | Neu5Ac $\beta$ -sp9                                |                                                           | 1209  | 0 | 4618  | 4 |
| 052 | Neu5Gc $\alpha$ -sp3                               |                                                           | 999   | 0 | 1080  | 1 |
| 053 | Neu5Gc $\beta$ -sp3                                |                                                           | 995   | 0 | 1965  | 1 |
| 054 | 9-NAc-Neu5Ac $\alpha$ -sp3                         |                                                           | 547   | 0 | 2680  | 2 |
| 055 | 3-O-Su-GlcNAc $\beta$ -sp3                         |                                                           | 5104  | 4 | 10286 | 8 |
| 056 | Gal $\alpha$ -sp7                                  |                                                           | 1609  | 1 | 3453  | 3 |
| 057 | D-Rib $\beta$ -sp4                                 |                                                           | 953   | 0 | 1947  | 1 |
| 058 | Fuc $\beta$ -sp3                                   |                                                           | 1346  | 0 | 3018  | 1 |
| 059 | $\alpha$ Kdo-5-phosphate-sp11                      |                                                           | 2150  | 2 | 2808  | 3 |
| 060 | 6-O-Su-Gal $\beta$ -sp3                            |                                                           | 2049  | 0 | 10416 | 8 |
| 061 | 3-O-Su-GalNAc $\alpha$ -sp3                        |                                                           | 1835  | 2 | 3892  | 5 |
| 071 | Fuc $\alpha$ 1-2Gal $\beta$ -sp3                   | H <sub>di</sub>                                           | 1313  | 0 | 5610  | 5 |
| 072 | Fuc $\alpha$ 1-3GlcNAc $\beta$ -sp3                |                                                           | 1972  | 0 | 7528  | 7 |
| 073 | Fuc $\alpha$ 1-4GlcNAc $\beta$ -sp3                | Le                                                        | 4179  | 5 | 10882 | 6 |
| 074 | Fuc $\beta$ 1-3GlcNAc $\beta$ -sp3                 |                                                           | 2502  | 1 | 11474 | 7 |
| 075 | Gal $\alpha$ 1-2Gal $\beta$ -sp3                   |                                                           | 7844  | 7 | 6652  | 7 |
| 076 | Gal $\alpha$ 1-3Gal $\beta$ -sp3                   | B <sub>di</sub>                                           | 2044  | 1 | 2442  | 2 |
| 077 | Gal $\alpha$ 1-3GalNAc $\beta$ -sp3                |                                                           | 3624  | 2 | 7263  | 6 |
| 078 | Gal $\alpha$ 1-3GalNAc $\alpha$ -sp3               | T <sub><math>\alpha</math>, core 8</sub>                  | 1168  | 0 | 5643  | 4 |
| 080 | Gal $\alpha$ 1-3GlcNAc $\beta$ -sp3                |                                                           | 17986 | 9 | 14484 | 9 |
| 081 | Gal $\alpha$ 1-4GlcNAc $\beta$ -sp3                | aLN                                                       | 12835 | 8 | 9160  | 7 |
| 082 | Gal $\alpha$ 1-4GlcNAc $\beta$ -sp8                | $\alpha$ LN                                               | 15126 | 8 | 9476  | 8 |
| 083 | Gal $\alpha$ 1-6Glc $\beta$ -sp4                   | melibiose                                                 | 5942  | 7 | 4403  | 3 |



|     |                       |                                |       |   |       |    |
|-----|-----------------------|--------------------------------|-------|---|-------|----|
| 084 | Galβ1-2Galβ-sp3       |                                | 4605  | 4 | 5243  | 4  |
| 085 | Galβ1-3GlcNAcβ-sp3    | Le <sup>c</sup>                | 2860  | 2 | 9867  | 7  |
| 086 | Galβ1-3GlcNAcβ-sp2    | Le <sup>c</sup>                | 3009  | 2 | 9213  | 6  |
| 087 | Galβ1-3Galβ-sp3       |                                | 1625  | 1 | 4885  | 4  |
| 088 | Galβ1-3GalNAcβ-sp3    | T <sub>ββ</sub>                | 4769  | 5 | 5868  | 5  |
| 089 | Galβ1-3GalNAcα-sp3    | TF, core 1                     | 1259  | 1 | 2292  | 4  |
| 092 | Galβ1-4Glcβ-sp2       | Lactose,<br>Lac                | 1488  | 0 | 1608  | 1  |
| 093 | Galβ1-4Glcβ-sp4       | Lactose,<br>Lac                | 14076 | 9 | 4614  | 5  |
| 094 | Galβ1-4Galβ-sp4       |                                | 1343  | 1 | 3186  | 2  |
| 096 | Galβ1-4GlcNAcβ-sp2    | N-<br>acetylactos<br>amine, LN | 687   | 0 | 546   | 0  |
| 097 | Galβ1-4GlcNAcβ-sp3    | N-<br>acetylactos<br>amine, LN | 757   | 0 | 601   | 0  |
| 098 | Galβ1-4GlcNAcβ-sp5    | N-<br>acetylactos<br>amine, LN | 975   | 0 | 747   | 0  |
| 099 | Galβ1-4GlcNAcβ-sp8    | N-<br>acetylactos<br>amine, LN | 696   | 0 | 757   | 0  |
| 100 | Galβ1-6Galβ-sp4       |                                | 4140  | 3 | 3146  | 4  |
| 101 | GalNAcα1-3GalNAcβ-sp3 | Fs-2                           | 8924  | 9 | 15067 | 10 |
| 102 | GalNAcα1-3Galβ-sp3    | A <sub>di</sub>                | 4766  | 3 | 13124 | 8  |
| 103 | GalNAcα1-3GalNAcα-sp3 | core 5                         | 2423  | 1 | 17484 | 9  |
| 104 | GalNAcβ1-3Galβ-sp3    |                                | 1809  | 1 | 3131  | 4  |
| 105 | GalNAcβ1-3GalNAcβ-sp3 | para-Fs                        | 3084  | 1 | 6100  | 6  |
| 106 | GalNAcβ1-4GlcNAcβ-sp3 | LacdiNAc                       | 3659  | 1 | 1789  | 1  |
| 107 | GalNAcβ1-4GlcNAcβ-sp2 | LacdiNAc                       | 1501  | 1 | 1881  | 2  |
| 110 | Glcα1-4Glcβ-sp3       | maltose                        | 2034  | 1 | 2267  | 1  |
| 111 | Glcβ1-4Glcβ-sp4       | cellobiose                     | 1429  | 1 | 2171  | 2  |
| 112 | Glcβ1-6Glcβ-sp4       | gentiobiose                    | 4221  | 3 | 4103  | 4  |
| 113 | GlcNAcβ1-3GalNAcα-sp3 | core 3                         | 2511  | 1 | 9227  | 8  |
| 114 | GlcNAcβ1-3Manβ-sp4    |                                | 2895  | 2 | 2052  | 1  |
| 115 | GlcNAcβ1-4GlcNAcβ-Asn | chitobiose-<br>Asn             | 2399  | 1 | 5255  | 5  |
| 116 | GlcNAcβ1-4GlcNAcβ-sp3 | chitobiose                     | 6098  | 4 | 8662  | 7  |
| 117 | GlcNAcβ1-4GlcNAcβ-sp4 | chitobiose                     | 3400  | 3 | 6934  | 5  |
| 118 | GlcNAcβ1-6GalNAcα-sp3 | core 6                         | 1989  | 0 | 11169 | 7  |
| 119 | Manα1-2Manβ-sp4       |                                | 1260  | 0 | 1515  | 1  |
| 120 | Manα1-3Manβ-sp4       |                                | 1318  | 1 | 2124  | 1  |

## Supplementary Material

|     |                                                     |     |       |    |       |   |
|-----|-----------------------------------------------------|-----|-------|----|-------|---|
| 121 | Man $\alpha$ 1-4Man $\beta$ -sp4                    |     | 1115  | 0  | 1508  | 1 |
| 122 | Man $\alpha$ 1-6Man $\beta$ -sp4                    |     | 1190  | 0  | 1103  | 1 |
| 123 | Man $\beta$ 1-4GlcNAc $\beta$ -sp4                  |     | 1619  | 0  | 5040  | 6 |
| 125 | 6-Bn-Gal $\beta$ 1-4GlcNAc $\beta$ -sp2             |     | 735   | 0  | 867   | 0 |
| 126 | 6-Bn-Gal $\alpha$ 1-4(6-Bn)GlcNAc $\beta$ -sp3      |     | 11774 | 8  | 7860  | 7 |
| 127 | Gal $\beta$ 1-4Glc $\beta$ -sp4-Phe                 |     | 24027 | 10 | 5351  | 5 |
| 128 | Gal $\beta$ 1-4Glc $\beta$ -sp4-Trp                 |     | 22860 | 10 | 4697  | 4 |
| 129 | Gal $\beta$ 1-3(6-O-Bn)GlcNAc $\beta$ -sp3          |     | 909   | 0  | 1027  | 0 |
| 130 | (6-O-Bn-Gal $\beta$ 1)-3GlcNAc $\beta$ -sp3         |     | 4975  | 3  | 9337  | 8 |
| 131 | (6-O-Bn-Gal $\beta$ 1)-3(6-O-Bn)GlcNAc $\beta$ -sp3 |     | 2880  | 3  | 2477  | 2 |
| 132 | Gal $\beta$ 1-3GalNAc $\alpha$ -sp5                 | TF  | 1750  | 2  | 3748  | 4 |
| 133 | Gal $\beta$ 1-4Glc $\beta$ -sp4-Ala                 |     | 13553 | 9  | 3557  | 2 |
| 134 | Gal $\beta$ 1-4Glc $\beta$ -sp4-Arg                 |     | 17986 | 10 | 3894  | 3 |
| 135 | Gal $\beta$ 1-4Glc $\beta$ -sp4-Asn                 |     | 7428  | 8  | 2001  | 1 |
| 136 | Gal $\beta$ 1-4Glc $\beta$ -sp4-Ile                 |     | 24449 | 10 | 5144  | 4 |
| 137 | Gal $\beta$ 1-4Glc $\beta$ -sp4-Nle                 |     | 23698 | 11 | 5828  | 6 |
| 138 | Gal $\beta$ 1-4Glc $\beta$ -sp4-Val                 |     | 24229 | 11 | 4862  | 4 |
| 139 | Gal $\beta$ 1-4GlcNAc $\alpha$ -sp3                 |     | 7107  | 4  | 7404  | 6 |
| 140 | Gal $\alpha$ 1-3GalNAc(fur) $\beta$ -sp3            |     | 6013  | 5  | 11683 | 8 |
| 142 | GlcNAc $\alpha$ 1-3GalNAc $\beta$ -sp3              |     | 10447 | 6  | 15367 | 8 |
| 143 | Fuc $\alpha$ 1-2(3-O-Su)Gal $\beta$ -sp3            |     | 1360  | 1  | 3954  | 2 |
| 144 | Gal $\beta$ 1-3(6-O-Su)GlcNAc $\beta$ -sp2          |     | 1397  | 1  | 2172  | 3 |
| 145 | Gal $\beta$ 1-3(6-O-Su)GlcNAc $\beta$ -sp3          |     | 1141  | 0  | 3235  | 4 |
| 146 | Gal $\beta$ 1-4(6-O-Su)Glc $\beta$ -sp2             |     | 1278  | 0  | 3980  | 2 |
| 149 | GlcNAc $\beta$ 1-4(6-O-Su)GlcNAc $\beta$ -sp2       |     | 13313 | 9  | 9010  | 9 |
| 150 | 3-O-Su-Gal $\beta$ 1-3GalNAc $\alpha$ -sp3          |     | 882   | 0  | 2616  | 2 |
| 151 | 6-O-Su-Gal $\beta$ 1-3GalNAc $\alpha$ -sp3          |     | 2286  | 2  | 5420  | 5 |
| 152 | 3-O-Su-Gal $\beta$ 1-4Glc $\beta$ -sp2              | SM3 | 797   | 0  | 1850  | 2 |
| 153 | 6-O-Su-Gal $\beta$ 1-4Glc $\beta$ -sp2              |     | 3351  | 1  | 3015  | 3 |
| 154 | 3-O-Su-Gal $\beta$ 1-3GlcNAc $\beta$ -sp3           |     | 3261  | 4  | 9337  | 7 |
| 156 | 3-O-Su-Gal $\beta$ 1-4GlcNAc $\beta$ -sp2           |     | 496   | 0  | 1225  | 1 |
| 158 | 4-O-Su-Gal $\beta$ 1-4GlcNAc $\beta$ -sp2           |     | 1368  | 0  | 7153  | 4 |
| 159 | 4-O-Su-Gal $\beta$ 1-4GlcNAc $\beta$ -sp3           |     | 1266  | 0  | 6612  | 4 |
| 160 | 6-O-Su-Gal $\beta$ 1-3GlcNAc $\beta$ -sp2           |     | 1895  | 1  | 6993  | 7 |
| 161 | 6-O-Su-Gal $\beta$ 1-3GlcNAc $\beta$ -sp3           |     | 1992  | 1  | 8381  | 7 |
| 162 | 6-O-Su-Gal $\beta$ 1-4GlcNAc $\beta$ -sp2           |     | 618   | 0  | 1174  | 0 |

|     |                                                                       |                                               |       |   |      |   |
|-----|-----------------------------------------------------------------------|-----------------------------------------------|-------|---|------|---|
| 164 | GlcA $\beta$ 1-3GlcNAc $\beta$ -sp3                                   |                                               | 2720  | 1 | 8782 | 7 |
| 165 | GlcA $\beta$ 1-3Gal $\beta$ -sp3                                      |                                               | 866   | 0 | 1408 | 1 |
| 166 | GlcA $\beta$ 1-6Gal $\beta$ -sp3                                      |                                               | 1783  | 0 | 3100 | 2 |
| 167 | GlcNAc $\beta$ 1-4-[HOOC(CH <sub>3</sub> )CH]-3-O-GlcNAc $\beta$ -sp4 | GlcNAc-Mur                                    | 12596 | 8 | 6005 | 6 |
| 168 | GlcNAc $\beta$ 1-4Mur-L-Ala-D-i-Gln-Lys                               | GMDP-Lys                                      | 24991 | 8 | 8621 | 7 |
| 169 | Neu5Ac $\alpha$ 2-3Gal $\beta$ -sp3                                   | GM4                                           | 738   | 0 | 1160 | 1 |
| 170 | Neu5Ac $\alpha$ 2-6Gal $\beta$ -sp3                                   |                                               | 894   | 0 | 5296 | 4 |
| 171 | Neu5Ac $\alpha$ 2-3GalNAc $\alpha$ -sp3                               |                                               | 1245  | 1 | 2614 | 1 |
| 172 | Neu5Ac $\alpha$ 2-6GalNAc $\alpha$ -sp3                               | SiaT <sub>n</sub>                             | 6510  | 2 | 4855 | 4 |
| 173 | Neu5Ac $\beta$ 2-6GalNAc $\alpha$ -sp3                                |                                               | 1035  | 0 | 5472 | 4 |
| 174 | Neu5Gc $\alpha$ 2-6GalNAc $\alpha$ -sp3                               | Neu5GcTn                                      | 1244  | 0 | 5605 | 5 |
| 175 | Neu5Gc $\beta$ 2-6GalNAc $\alpha$ -sp3                                |                                               | 980   | 0 | 3826 | 2 |
| 176 | 3-O-Su-Gal $\beta$ 1-4(6-O-Su)Glc $\beta$ -sp2                        |                                               | 937   | 0 | 2054 | 1 |
| 177 | 3-O-Su-Gal $\beta$ 1-4(6-O-Su)GlcNAc $\beta$ -sp3                     |                                               | 1093  | 1 | 1083 | 1 |
| 178 | 6-O-Su-Gal $\beta$ 1-4(6-O-Su)Glc $\beta$ -sp2                        |                                               | 765   | 0 | 2677 | 2 |
| 179 | 6-O-Su-Gal $\beta$ 1-3(6-O-Su)GlcNAc $\beta$ -sp2                     |                                               | 850   | 0 | 2060 | 2 |
| 180 | 6-O-Su-Gal $\beta$ 1-4(6-O-Su)GlcNAc $\beta$ -sp2                     |                                               | 655   | 0 | 1268 | 0 |
| 181 | 3,4-O-Su <sub>2</sub> -Gal $\beta$ 1-4GlcNAc $\beta$ -sp3             |                                               | 612   | 0 | 2829 | 3 |
| 182 | 3,6-O-Su <sub>2</sub> -Gal $\beta$ 1-4GlcNAc $\beta$ -sp2             |                                               | 585   | 0 | 507  | 0 |
| 183 | 4,6-O-Su <sub>2</sub> -Gal $\beta$ 1-4GlcNAc $\beta$ -sp2             |                                               | 1557  | 0 | 8861 | 8 |
| 184 | 4,6-O-Su <sub>2</sub> -Gal $\beta$ 1-4GlcNAc $\beta$ -sp3             |                                               | 1386  | 0 | 7879 | 6 |
| 186 | Neu5Ac $\alpha$ 2-8Neu5Ac $\alpha$ 2-sp3                              | (Neu5Ac) <sub>2</sub> ,<br>(Sia) <sub>2</sub> | 315   | 0 | 285  | 0 |
| 187 | Neu5Ac $\alpha$ 2-8Neu5Ac $\alpha$ 2-sp9                              | (Sia) <sub>2</sub>                            | 370   | 0 | 449  | 0 |
| 188 | Neu5Ac $\alpha$ 2-8Neu5Ac $\beta$ -sp9                                |                                               | 649   | 0 | 5047 | 4 |
| 189 | 3,6-O-Su <sub>2</sub> -Gal $\beta$ 1-4(6-O-Su)GlcNAc $\beta$ -sp2     |                                               | 1049  | 0 | 1989 | 1 |
| 190 | Gal $\beta$ 1-4-(6-P)GlcNAc $\beta$ -sp2                              |                                               | 831   | 0 | 1237 | 0 |
| 191 | 6-P-Gal $\beta$ 1-4GlcNAc $\beta$ -sp2                                |                                               | 1814  | 2 | 4644 | 3 |
| 192 | GalNAc $\beta$ 1-4(6-O-Su)GlcNAc $\beta$ -sp3                         |                                               | 2549  | 2 | 2059 | 1 |
| 193 | 3-O-Su-GalNAc $\beta$ 1-4GlcNAc $\beta$ -sp3                          |                                               | 5239  | 3 | 5131 | 5 |
| 194 | 6-O-Su-GalNAc $\beta$ 1-4GlcNAc $\beta$ -sp3                          |                                               | 769   | 0 | 2238 | 2 |
| 195 | 6-O-Su-GalNAc $\beta$ 1-4(3-O-Ac)GlcNAc $\beta$ -sp3                  |                                               | 820   | 0 | 1976 | 1 |
| 196 | 3-O-Su-GalNAc $\beta$ 1-4(3-O-Su)GlcNAc $\beta$ -sp3                  |                                               | 3124  | 3 | 4423 | 6 |
| 197 | 3,6-O-Su <sub>2</sub> -GalNAc $\beta$ 1-4GlcNAc $\beta$ -sp3          |                                               | 6226  | 4 | 4697 | 5 |
| 198 | 4,6-O-Su <sub>2</sub> -GalNAc $\beta$ 1-4GlcNAc $\beta$ -sp3          |                                               | 522   | 0 | 811  | 0 |
| 199 | 4,6-O-Su <sub>2</sub> -GalNAc $\beta$ 1-4-(3-O-Ac)GlcNAc $\beta$ -sp3 |                                               | 787   | 0 | 2264 | 1 |

## Supplementary Material

|     |                                                                                          |                                          |      |   |      |   |
|-----|------------------------------------------------------------------------------------------|------------------------------------------|------|---|------|---|
| 200 | 4-O-Su-GalNAc $\beta$ 1-4GlcNAc $\beta$ -sp3                                             |                                          | 457  | 0 | 633  | 0 |
| 201 | 3,4-O-Su <sub>2</sub> -GalNAc $\beta$ 1-4GlcNAc $\beta$ -sp3                             |                                          | 2862 | 1 | 6143 | 7 |
| 202 | 6-O-Su-GalNAc $\beta$ 1-4(6-O-Su)GlcNAc $\beta$ -sp3                                     |                                          | 5303 | 3 | 3194 | 2 |
| 203 | Gal $\beta$ 1-4(6-O-Su)GlcNAc $\beta$ -sp2                                               |                                          | 554  | 0 | 624  | 0 |
| 204 | 4-O-Su-GalNAc $\beta$ 1-4GlcNAc $\beta$ -sp2                                             |                                          | 2579 | 1 | 699  | 0 |
| 205 | Neu5Ac $\alpha$ 2-6GalNAc $\beta$ -sp3                                                   |                                          | 4506 | 1 | 3927 | 3 |
| 206 | Neu5Gc $\alpha$ 2-3Gal $\beta$ -sp3                                                      |                                          | 662  | 0 | 640  | 0 |
| 207 | Neu5Ac $\beta$ 2-6GalNAc $\beta$ -sp3                                                    |                                          | 904  | 0 | 4445 | 4 |
| 208 | Gal $\beta$ 1-3GlcNAc $\beta$ -sp4                                                       | Le <sup>e</sup>                          | 1436 | 1 | 910  | 1 |
| 209 | $\alpha$ Kdo-(2 $\rightarrow$ 4)- $\alpha$ Kdo-sp11                                      |                                          | 3676 | 4 | 7193 | 5 |
| 210 | L,D-Hep-(1 $\rightarrow$ 5)- $\alpha$ Kdo-4-phosphate-sp11                               |                                          | 929  | 0 | 3597 | 3 |
| 211 | $\alpha$ Kdo-(2 $\rightarrow$ 8)- $\alpha$ Kdo-sp11                                      |                                          | 5903 | 6 | 7650 | 6 |
| 212 | D-glycero- $\alpha$ -D-talo-octulosonic acid (Ko)-(2 $\rightarrow$ 4)- $\alpha$ Kdo-sp11 |                                          | 1343 | 1 | 2250 | 1 |
| 213 | Neu5Ac $\beta$ 2-6Gal $\beta$ -sp3                                                       |                                          | 1336 | 0 | 4532 | 4 |
| 214 | $\Delta$ GlcA $\beta$ 1-3Gal $\beta$ -sp3                                                | $\Delta$ GlcA $\beta$ 3Gal               | 739  | 0 | 1900 | 1 |
| 215 | Fuc $\alpha$ 1-2Gal $\beta$ 1-3GlcNAc $\beta$ -sp3                                       | Le <sup>d</sup> , H (type 1)             | 801  | 0 | 4142 | 3 |
| 216 | Fuc $\alpha$ 1-2Gal $\beta$ 1-4GlcNAc $\beta$ -sp3                                       | H (type 2)                               | 348  | 0 | 548  | 0 |
| 217 | Fuc $\alpha$ 1-2Gal $\beta$ 1-3GalNAc $\alpha$ -sp3                                      | H (type 3)                               | 894  | 0 | 2751 | 2 |
| 219 | Fuc $\alpha$ 1-2Gal $\beta$ 1-4Glc $\beta$ -sp4                                          | H (type 6)                               | 7996 | 6 | 2440 | 3 |
| 220 | Gal $\alpha$ 1-3Gal $\beta$ 1-4Glc $\beta$ -sp2                                          |                                          | 1372 | 0 | 3201 | 4 |
| 221 | Gal $\alpha$ 1-3Gal $\beta$ 1-4Glc $\beta$ -sp4                                          |                                          | 6739 | 7 | 3490 | 3 |
| 222 | Gal $\alpha$ 1-3Gal $\beta$ 1-4GlcNAc $\beta$ -sp3                                       | Galili (tri)                             | 1875 | 2 | 3719 | 3 |
| 223 | Gal $\alpha$ 1-4Gal $\beta$ 1-4Glc $\beta$ -sp2                                          | P <sup>k</sup> , Gb3, GbOse <sub>3</sub> | 2134 | 1 | 5424 | 6 |
| 225 | Gal $\alpha$ 1-4Gal $\beta$ 1-4GlcNAc $\beta$ -sp2                                       | P <sub>1</sub>                           | 1812 | 1 | 6721 | 5 |
| 226 | Gal $\alpha$ 1-3(Fuc $\alpha$ 1-2)Gal $\beta$ -sp3                                       | B <sub>tri</sub>                         | 1107 | 0 | 2283 | 2 |
| 227 | Gal $\alpha$ 1-3(Fuc $\alpha$ 1-2)Gal $\beta$ -sp5                                       | B <sub>tri</sub>                         | 1044 | 0 | 2078 | 2 |
| 228 | Gal $\beta$ 1-2Gal $\alpha$ 1-3GlcNAc $\beta$ -sp3                                       |                                          | 4034 | 4 | 4644 | 5 |
| 229 | Gal $\beta$ 1-3Gal $\beta$ 1-4GlcNAc $\beta$ -sp4                                        |                                          | 1178 | 0 | 5158 | 5 |
| 231 | Gal $\beta$ 1-4GlcNAc $\beta$ 1-3GalNAc $\alpha$ -sp3                                    |                                          | 755  | 0 | 2856 | 2 |
| 232 | Gal $\beta$ 1-4GlcNAc $\beta$ 1-6GalNAc $\alpha$ -sp3                                    |                                          | 2262 | 2 | 7259 | 7 |
| 233 | Gal $\beta$ 1-3(Fuc $\alpha$ 1-4)GlcNAc $\beta$ -sp3                                     | Le <sup>a</sup>                          | 558  | 0 | 788  | 1 |
| 234 | Gal $\beta$ 1-4(Fuc $\alpha$ 1-3)GlcNAc $\beta$ -sp3                                     | Le <sup>x</sup>                          | 424  | 0 | 345  | 0 |
| 235 | GalNAc $\alpha$ 1-3(Fuc $\alpha$ 1-2)Gal $\beta$ -sp3                                    | A <sub>tri</sub>                         | 3866 | 3 | 3878 | 2 |
| 236 | GalNAc $\alpha$ 1-3(Fuc $\alpha$ 1-2)Gal $\beta$ -sp5                                    | A <sub>tri</sub>                         | 3469 | 3 | 2384 | 3 |

|     |                                                                                               |                   |       |    |       |    |
|-----|-----------------------------------------------------------------------------------------------|-------------------|-------|----|-------|----|
| 237 | GalNH $\alpha$ 1-3(Fuca1-2)Gal $\beta$ -OCH <sub>2</sub> CH <sub>2</sub> CH <sub>2</sub> NHAc | AB <sub>tri</sub> | 498   | 0  | 453   | 0  |
| 239 | GalNAc $\beta$ 1-3(Fuca1-2)Gal $\beta$ -sp3                                                   |                   | 819   | 0  | 3372  | 4  |
| 240 | (Glc $\alpha$ 1-4) <sub>3</sub> $\beta$ -sp4                                                  | maltotriose       | 1176  | 1  | 1655  | 2  |
| 241 | (Glc $\alpha$ 1-6) <sub>3</sub> $\beta$ -sp4                                                  | isomaltotriose    | 1125  | 0  | 1146  | 0  |
| 242 | GlcNAc $\alpha$ 1-3Gal $\beta$ 1-4GlcNAc $\beta$ -sp2                                         |                   | 2786  | 3  | 14904 | 9  |
| 243 | GlcNAc $\alpha$ 1-3Gal $\beta$ 1-4GlcNAc $\beta$ -sp3                                         |                   | 3035  | 2  | 16162 | 9  |
| 245 | GlcNAc $\alpha$ 1-6Gal $\beta$ 1-4GlcNAc $\beta$ -sp2                                         |                   | 3974  | 3  | 4436  | 5  |
| 246 | GlcNAc $\beta$ 1-2Gal $\beta$ 1-3GalNAc $\alpha$ -sp3                                         |                   | 14644 | 10 | 11352 | 9  |
| 247 | GlcNAc $\beta$ 1-3Gal $\beta$ 1-3GalNAc $\alpha$ -sp3                                         |                   | 988   | 0  | 3707  | 2  |
| 248 | GlcNAc $\beta$ 1-3Gal $\beta$ 1-4Glc $\beta$ -sp2                                             |                   | 1050  | 0  | 1930  | 1  |
| 249 | GlcNAc $\beta$ 1-3Gal $\beta$ 1-4GlcNAc $\beta$ -sp2                                          |                   | 565   | 0  | 820   | 0  |
| 250 | GlcNAc $\beta$ 1-3Gal $\beta$ 1-4GlcNAc $\beta$ -sp3                                          |                   | 1365  | 1  | 685   | 0  |
| 251 | GlcNAc $\beta$ 1-4Gal $\beta$ 1-4GlcNAc $\beta$ -sp2                                          |                   | 7196  | 5  | 12322 | 7  |
| 252 | GlcNAc $\beta$ 1-4GlcNAc $\beta$ 1-4GlcNAc $\beta$ -sp4                                       | chitotriose       | 3352  | 2  | 6177  | 6  |
| 253 | GlcNAc $\beta$ 1-6Gal $\beta$ 1-4GlcNAc $\beta$ -sp2                                          |                   | 1161  | 1  | 2113  | 1  |
| 254 | GlcNAc $\beta$ 1-6(Gal $\beta$ 1-3)GalNAc $\alpha$ -sp3                                       | core 2            | 1163  | 1  | 2812  | 4  |
| 255 | GlcNAc $\beta$ 1-6(GlcNAc $\beta$ 1-3)GalNAc $\alpha$ -sp3                                    | core 4            | 4251  | 2  | 8235  | 8  |
| 256 | GlcNAc $\beta$ 1-6(GlcNAc $\beta$ 1-4)GalNAc $\alpha$ -sp3                                    |                   | 12212 | 10 | 16124 | 10 |
| 258 | Man $\alpha$ 1-6(Man $\alpha$ 1-3)Man $\beta$ -sp4                                            | Man <sub>3</sub>  | 916   | 0  | 1610  | 1  |
| 259 | Gal $\beta$ 1-4(Gal $\beta$ 1-3)GlcNAc $\beta$ -sp3                                           |                   | 589   | 0  | 741   | 1  |
| 260 | Gal $\beta$ 1-3(Fuc $\beta$ 1-4)GlcNAc $\beta$ -sp3                                           |                   | 544   | 0  | 472   | 0  |
| 261 | Gal $\beta$ 1-4(Fuc $\beta$ 1-3)GlcNAc $\beta$ -sp3                                           |                   | 1066  | 1  | 611   | 0  |
| 262 | Gal $\beta$ 1-3GalNAc $\beta$ 1-3Gal $\beta$ -sp4                                             |                   | 3215  | 3  | 5652  | 4  |
| 263 | (GalNAc $\beta$ -PEG <sub>2</sub> ) <sub>3</sub> - $\beta$ -DD                                |                   | 7288  | 2  | 7754  | 7  |
| 264 | Gal $\beta$ 1-4Gal $\beta$ 1-4GlcNAc $\beta$ -sp3                                             |                   | 5559  | 5  | 11786 | 8  |
| 266 | Gal $\alpha$ 1-4Gal $\beta$ 1-4GlcNAc $\beta$ -sp3                                            | P <sub>1</sub>    | 1416  | 0  | 5773  | 5  |
| 267 | GlcNAc $\beta$ 1-3Gal $\beta$ 1-3GlcNAc $\beta$ -sp3                                          |                   | 2536  | 3  | 11891 | 7  |
| 268 | GlcNAc $\beta$ 1-4(Fuca1-6)GlcNAc $\beta$ -sp3                                                |                   | 2776  | 1  | 5150  | 6  |
| 269 | Gal $\beta$ 1-3Gal $\beta$ 1-4Glc $\beta$ -sp4                                                |                   | 5049  | 5  | 5410  | 5  |
| 270 | Gal $\beta$ 1-4Gal $\beta$ 1-4Glc $\beta$ -sp4                                                |                   | 1923  | 1  | 5551  | 4  |
| 271 | Gal $\beta$ 1-6Gal $\beta$ 1-4Glc $\beta$ -sp4                                                |                   | 2703  | 3  | 6145  | 6  |
| 272 | Neu5Ac $\alpha$ 2-3Gal $\beta$ 1-4Glc $\beta$ -sp4-Cit                                        |                   | 10986 | 6  | 1191  | 1  |
| 273 | Fuc $\beta$ 1-2Gal $\beta$ 1-4GlcNAc $\beta$ -sp3                                             |                   | 795   | 0  | 3725  | 2  |
| 274 | GalNAc $\alpha$ 1-3Gal $\beta$ 1-4GlcNAc $\beta$ -sp3                                         |                   | 4604  | 2  | 13900 | 8  |
| 275 | GalNAc $\beta$ 1-3Gal $\beta$ 1-4GlcNAc $\beta$ -sp3                                          |                   | 1060  | 0  | 2174  | 2  |
| 276 | GlcNAc $\beta$ 1-4Gal $\beta$ 1-4GlcNAc $\beta$ -sp3                                          |                   | 8309  | 6  | 10740 | 7  |

## Supplementary Material

|     |                                                                                                                                                           |                         |      |   |       |   |
|-----|-----------------------------------------------------------------------------------------------------------------------------------------------------------|-------------------------|------|---|-------|---|
| 277 | GalN(Gc) $\alpha$ 1-3(Fuca1-2)Gal $\beta$ -sp3                                                                                                            | A <sub>tri</sub> (Gc)   | 1220 | 2 | 762   | 0 |
| 278 | GalNAc $\alpha$ 1-3GalNAc $\beta$ 1-3Gal $\beta$ -sp3                                                                                                     | Fs-3                    | 8792 | 8 | 19525 | 9 |
| 287 | 3-O-Su-Gal $\beta$ 1-3(Fuca1-4)GlcNAc $\beta$ -sp3                                                                                                        | 3'-O-Su-Le <sup>a</sup> | 532  | 0 | 942   | 1 |
| 288 | 3-O-Su-Gal $\beta$ 1-4(Fuca1-3)GlcNAc $\beta$ -sp3                                                                                                        | 3'-O-Su-Le <sup>x</sup> | 2314 | 1 | 283   | 0 |
| 289 | Neu5Ac $\alpha$ 2-6(Gal $\beta$ 1-3)GalNAc $\alpha$ -sp3                                                                                                  |                         | 746  | 0 | 1834  | 2 |
| 290 | Neu5Ac $\alpha$ 2-6(Gal $\alpha$ 1-3)GalNAc $\alpha$ -sp3                                                                                                 |                         | 410  | 0 | 1350  | 1 |
| 291 | Neu5Ac $\beta$ 2-6(Gal $\beta$ 1-3)GalNAc $\alpha$ -sp3                                                                                                   |                         | 3034 | 1 | 4043  | 4 |
| 292 | Neu5Ac $\alpha$ 2-3Gal $\beta$ 1-3GalNAc $\alpha$ -sp3                                                                                                    |                         | 559  | 0 | 1716  | 1 |
| 293 | Neu5Ac $\alpha$ 2-3Gal $\beta$ 1-4Glc $\beta$ -sp3                                                                                                        | 3'SL                    | 516  | 0 | 777   | 0 |
| 294 | Neu5Ac $\alpha$ 2-3Gal $\beta$ 1-4Glc $\beta$ -sp4                                                                                                        | 3'SL                    | 9946 | 4 | 1779  | 2 |
| 295 | Neu5Ac $\alpha$ 2-6Gal $\beta$ 1-4Glc $\beta$ -sp2                                                                                                        | 6'SL                    | 442  | 0 | 691   | 1 |
| 296 | Neu5Ac $\alpha$ 2-6Gal $\beta$ 1-4Glc $\beta$ -sp4                                                                                                        | 6'SL                    | 1172 | 1 | 1959  | 2 |
| 297 | Neu5Ac $\beta$ 2-6Gal $\beta$ 1-4Glc $\beta$ -sp2                                                                                                         |                         | 703  | 0 | 3047  | 2 |
| 298 | Neu5Ac $\alpha$ 2-3Gal $\beta$ 1-4GlcNAc $\beta$ -sp3                                                                                                     | 3'SLN                   | 286  | 0 | 409   | 0 |
| 299 | Neu5Ac $\alpha$ 2-3Gal $\beta$ 1-3GlcNAc $\beta$ -sp3                                                                                                     | 3'SiaLeC                | 3900 | 5 | 10595 | 7 |
| 300 | Neu5Ac $\alpha$ 2-6Gal $\beta$ 1-4GlcNAc $\beta$ -sp3                                                                                                     | 6'SLN                   | 333  | 0 | 399   | 0 |
| 302 | Neu5Ac $\beta$ 2-6Gal $\beta$ 1-4GlcNAc $\beta$ -sp3                                                                                                      |                         | 745  | 0 | 2542  | 2 |
| 303 | Neu5Gc $\alpha$ 2-3Gal $\beta$ 1-4GlcNAc $\beta$ -sp3                                                                                                     |                         | 296  | 0 | 475   | 0 |
| 304 | Neu5Gc $\alpha$ 2-6Gal $\beta$ 1-4GlcNAc $\beta$ -sp3                                                                                                     |                         | 345  | 0 | 323   | 0 |
| 305 | Neu5Gc $\beta$ 2-6Gal $\beta$ 1-4GlcNAc $\beta$ -sp3                                                                                                      |                         | 829  | 0 | 1399  | 1 |
| 306 | 9-NAc-Neu5Ac $\alpha$ 2-6Gal $\beta$ 1-4GlcNAc $\beta$ -sp3                                                                                               |                         | 498  | 0 | 4101  | 2 |
| 307 | KDN $\alpha$ 2-3Gal $\beta$ 1-3GlcNAc $\beta$ -sp2                                                                                                        |                         | 2710 | 1 | 10405 | 7 |
| 308 | KDN $\alpha$ 2-3Gal $\beta$ 1-4GlcNAc $\beta$ -sp2                                                                                                        |                         | 571  | 0 | 2363  | 2 |
| 309 | Neu5Ac $\alpha$ 2-6(Neu5Ac $\alpha$ 2-3)GalNAc $\alpha$ -sp3                                                                                              |                         | 307  | 0 | 527   | 0 |
| 310 | Neu5Ac $\alpha$ 2-3Gal $\beta$ 1-4GlcNAc $\beta$ -<br>O(CH <sub>2</sub> ) <sub>3</sub> NH-amide-Neu5Ac $\alpha$ 2-3Gal $\beta$ 1-<br>4GlcNAc $\beta$ -sp3 |                         | 325  | 0 | 262   | 0 |
| 315 | Neu5Ac $\alpha$ 2-3Gal $\beta$ 1-4-(6-O-Su)GlcNAc $\beta$ -<br>sp3                                                                                        |                         | 362  | 0 | 460   | 0 |
| 316 | Fuca1-2(6-O-Su)Gal $\beta$ 1-4GlcNAc $\beta$ -sp3                                                                                                         | 6'-<br>suH(type2)       | 365  | 0 | 420   | 0 |
| 318 | Neu5Ac $\alpha$ 2-6Gal $\beta$ 1-4(6-O-Su)GlcNAc $\beta$ -<br>sp3                                                                                         |                         | 341  | 0 | 624   | 0 |
| 319 | Neu5Ac $\alpha$ 2-3(6-O-Su)Gal $\beta$ 1-4GlcNAc $\beta$ -<br>sp3                                                                                         |                         | 276  | 0 | 306   | 0 |
| 320 | 4-O-Su-Neu5Ac $\alpha$ 2-3(6-O-Su)Gal $\beta$ 1-<br>4GlcNAc $\beta$ -sp3                                                                                  |                         | 417  | 0 | 811   | 0 |
| 321 | (Neu5Ac $\alpha$ 2-8) <sub>3</sub> -sp3                                                                                                                   | (Sia) <sub>3</sub>      | 300  | 0 | 350   | 0 |
| 322 | (Neu5Ac $\alpha$ 2-8) <sub>3</sub> $\beta$ -sp3                                                                                                           |                         | 625  | 0 | 3557  | 3 |
| 323 | Neu5Ac $\alpha$ 2-6Gal $\beta$ 1-3GlcNAc $\beta$ -sp3                                                                                                     | 6'-SiaLe <sup>c</sup>   | 916  | 0 | 2338  | 3 |

|     |                                                                                       |                             |       |   |       |   |
|-----|---------------------------------------------------------------------------------------|-----------------------------|-------|---|-------|---|
| 324 | Neu5Ac $\alpha$ 2-6Gal $\beta$ 1-3(6-O-Su)GlcNAc $\beta$ -sp3                         |                             | 909   | 0 | 1249  | 1 |
| 325 | Neu5Ac $\alpha$ 2-3Gal $\beta$ 1-4Glc $\beta$ -sp4-Ala                                |                             | 10125 | 6 | 1355  | 1 |
| 326 | Neu5Ac $\alpha$ 2-3Gal $\beta$ 1-4Glc $\beta$ -sp4-Ile                                |                             | 10081 | 6 | 1340  | 1 |
| 327 | Neu5Ac $\alpha$ 2-3Gal $\beta$ 1-4Glc $\beta$ -sp4-Nle                                |                             | 11318 | 6 | 1616  | 1 |
| 328 | Neu5Ac $\alpha$ 2-3Gal $\beta$ 1-4Glc $\beta$ -sp4-Phe                                |                             | 10120 | 5 | 1378  | 1 |
| 329 | Neu5Ac $\alpha$ 2-3Gal $\beta$ 1-4Glc $\beta$ -sp4-Trp                                |                             | 13038 | 6 | 2253  | 2 |
| 330 | Neu5Ac $\alpha$ 2-3Gal $\beta$ 1-4Glc $\beta$ -sp4-Val                                |                             | 11273 | 6 | 1070  | 0 |
| 331 | Neu5Gc $\alpha$ 2-3Gal $\beta$ 1-3GlcNAc $\beta$ -sp3                                 |                             | 4086  | 5 | 11438 | 7 |
| 332 | Neu5Ac $\alpha$ 2-3Gal $\beta$ 1-4Glc $\beta$ -sp4-Asn                                |                             | 8253  | 6 | 1138  | 0 |
| 333 | Neu5Gc $\alpha$ 2-3Gal $\beta$ 1-3(6-O-Su)GlcNAc $\beta$ -sp3                         |                             | 1627  | 1 | 2619  | 2 |
| 334 | Neu5Gc $\alpha$ 2-3Gal $\beta$ 1-4(6-O-Su)GlcNAc $\beta$ -sp3                         |                             | 1083  | 1 | 691   | 0 |
| 335 | Neu5Ac $\alpha$ 2-3Gal $\beta$ 1-3(6-O-Su)GlcNAc $\beta$ -sp3                         |                             | 1467  | 1 | 1703  | 2 |
| 336 | $\alpha$ Kdo-(2 $\rightarrow$ 8)- $\alpha$ Kdo-(2 $\rightarrow$ 4)- $\alpha$ Kdo-sp11 |                             | 8196  | 6 | 8844  | 6 |
| 337 | GalNAc $\alpha$ 1-4Gal $\beta$ 1-4GlcNAc $\beta$ -sp3                                 |                             | 3479  | 5 | 7396  | 7 |
| 338 | Neu5Ac $\alpha$ 2-6Gal $\beta$ 1-3GalNAc $\alpha$ -sp3                                | 6'-sialyl-TF                | 1124  | 1 | 1195  | 0 |
| 339 | Neu5Ac $\beta$ 2-6Gal $\beta$ 1-3GalNAc $\alpha$ -sp3                                 |                             | 1024  | 0 | 5501  | 5 |
| 340 | Gal $\alpha$ 1-3(Neu5Ac $\beta$ 2-6)GalNAc $\beta$ -sp3                               |                             | 935   | 0 | 5384  | 5 |
| 341 | Neu5Ac $\alpha$ 2-3-(6-O-Su)Gal $\beta$ 1-4GlcNAc $\beta$ -sp2                        |                             | 287   | 0 | 388   | 0 |
| 359 | Gal $\alpha$ 1-3(Fuc $\alpha$ 1-2)Gal $\beta$ 1-3GlcNAc $\beta$ -sp3                  | B (type 1)                  | 5790  | 3 | 4958  | 3 |
| 360 | Gal $\alpha$ 1-3(Fuc $\alpha$ 1-2)Gal $\beta$ 1-4GlcNAc $\beta$ -sp3                  | B (type 2)                  | 976   | 1 | 2409  | 3 |
| 361 | Gal $\alpha$ 1-3(Fuc $\alpha$ 1-2)Gal $\beta$ 1-4GlcNAc $\beta$ -sp2                  | B (type 2)                  | 879   | 0 | 2360  | 3 |
| 362 | Gal $\alpha$ 1-3(Fuc $\alpha$ 1-2)Gal $\beta$ 1-3GalNAc $\alpha$ -sp3                 | B (type 3)                  | 2839  | 2 | 3936  | 4 |
| 363 | Gal $\alpha$ 1-3(Fuc $\alpha$ 1-2)Gal $\beta$ 1-3GalNAc $\beta$ -sp3                  | B (type 4)                  | 4122  | 2 | 3028  | 3 |
| 364 | Gal $\alpha$ 1-3Gal $\beta$ 1-4(Fuc $\alpha$ 1-3)GlcNAc $\beta$ -sp3                  | $\alpha$ GalLe <sup>x</sup> | 1844  | 2 | 1224  | 0 |
| 365 | Gal $\alpha$ 1-4(Fuc $\alpha$ 1-2)Gal $\beta$ 1-4GlcNAc $\beta$ -sp3                  |                             | 1364  | 0 | 2913  | 3 |
| 366 | GalNAc $\alpha$ 1-3(Fuc $\alpha$ 1-2)Gal $\beta$ 1-3GlcNAc $\beta$ -sp3               | A (type 1)                  | 6857  | 5 | 5894  | 6 |
| 368 | GalNAc $\alpha$ 1-3(Fuc $\alpha$ 1-2)Gal $\beta$ 1-4GlcNAc $\beta$ -sp3               | A (type 2)                  | 2223  | 1 | 4757  | 4 |
| 369 | GalNAc $\alpha$ 1-4(Fuc $\alpha$ 1-2)Gal $\beta$ 1-4GlcNAc $\beta$ -sp3               |                             | 2407  | 2 | 10296 | 5 |
| 370 | GalNAc $\beta$ 1-3(Fuc $\alpha$ 1-2)Gal $\beta$ 1-4GlcNAc $\beta$ -sp3                |                             | 500   | 0 | 1364  | 1 |
| 371 | Fuc $\alpha$ 1-2Gal $\beta$ 1-3(Fuc $\alpha$ 1-4)GlcNAc $\beta$ -sp3                  | Le <sup>b</sup>             | 984   | 0 | 2419  | 2 |
| 372 | Fuc $\alpha$ 1-2Gal $\beta$ 1-4(Fuc $\alpha$ 1-3)GlcNAc $\beta$ -sp3                  | Le <sup>y</sup>             | 731   | 1 | 307   | 0 |
| 373 | Gal $\alpha$ 1-3Gal $\beta$ 1-4GlcNAc $\beta$ 1-3Gal $\beta$ -sp3                     | Galili (tetra)              | 4446  | 2 | 5824  | 4 |
| 374 | Gal $\alpha$ 1-3(Gal $\alpha$ 1-4)Gal $\beta$ 1-4GlcNAc $\beta$ -sp3                  |                             | 1653  | 1 | 3479  | 5 |
| 375 | Gal $\alpha$ 1-4GlcNAc $\beta$ 1-3Gal $\beta$ 1-4GlcNAc $\beta$ -                     |                             | 9635  | 8 | 10750 | 8 |

Supplementary Material

|     |                                            |                                            |       |   |       |   |
|-----|--------------------------------------------|--------------------------------------------|-------|---|-------|---|
|     | sp3                                        |                                            |       |   |       |   |
| 376 | Galβ1-3GlcNAcβ1-3Galβ1-4Glcβ-sp4           | N-acetylacto-<br>N-tetraose,<br>LNT        | 15939 | 6 | 3004  | 4 |
| 377 | Galβ1-3GlcNAcβ1-3Galβ1-3GlcNAcβ-sp2        |                                            | 2338  | 2 | 8026  | 6 |
| 378 | Galβ1-3GlcNAcα1-3Galβ1-4GlcNAcβ-sp3        |                                            | 17225 | 9 | 12928 | 8 |
| 379 | Galβ1-3GlcNAcβ1-3Galβ1-4GlcNAcβ-sp3        |                                            | 512   | 0 | 913   | 1 |
| 380 | Galβ1-3GlcNAcα1-6Galβ1-4GlcNAcβ-sp2        |                                            | 17866 | 9 | 6284  | 6 |
| 381 | Galβ1-3GlcNAcβ1-6Galβ1-4GlcNAcβ-sp2        |                                            | 809   | 0 | 1027  | 1 |
| 382 | Galβ1-3GalNAcβ1-4Galβ1-4Glcβ-sp3           | GA1,<br>asialo-GM1                         | 2614  | 2 | 7904  | 7 |
| 383 | Galβ1-4GlcNAcβ1-3Galβ1-4Glcβ-sp4           | N-acetylacto-<br>neo-<br>tetraose,<br>LNnT | 10513 | 6 | 2315  | 3 |
| 384 | Galβ1-4GlcNAcβ1-3Galβ1-4GlcNAcβ-sp2        | i                                          | 777   | 1 | 324   | 0 |
| 386 | Galβ1-4GlcNAcα1-6Galβ1-4GlcNAcβ-sp2        |                                            | 4895  | 3 | 7764  | 5 |
| 387 | Galβ1-4GlcNAcβ1-6Galβ1-4GlcNAcβ-sp2        |                                            | 2520  | 1 | 1290  | 1 |
| 388 | Galβ1-4GlcNAcβ1-6(Galβ1-3)GalNAcα-sp3      |                                            | 986   | 0 | 1576  | 2 |
| 389 | GalNAcβ1-3Galα1-4Galβ1-4Glcβ-sp3           | Gb4, P                                     | 7335  | 5 | 7361  | 5 |
| 390 | (Glcα1-4) <sub>4</sub> β-sp4               | maltotetrao-<br>se                         | 1660  | 0 | 4170  | 2 |
| 392 | GalNAcα1-3(Fuca1-2)Galβ1-3GalNAcα-sp3      | A (type 3)                                 | 7921  | 4 | 8230  | 6 |
| 394 | GlcNAcβ1-4(GlcNAcβ1-3)Galβ1-4GlcNAcβ-sp2   |                                            | 3171  | 4 | 4225  | 3 |
| 395 | GlcNAcβ1-6(GlcNAcβ1-3)Galβ1-4GlcNAcβ-sp2   | T <sub>k</sub>                             | 6193  | 1 | 861   | 1 |
| 396 | (GlcNAcβ1) <sub>3</sub> -3,4,6-GalNAcα-sp3 |                                            | 4518  | 4 | 9667  | 7 |
| 397 | Galβ1-3GlcN(Fm)β1-3Galβ1-4GlcNAcβ-sp3      |                                            | 11759 | 8 | 13243 | 7 |
| 398 | Galβ1-3GlcN(Fm)β1-3Galβ1-3GlcNAcβ-sp3      |                                            | 4683  | 5 | 13263 | 8 |
| 399 | Galβ1-3GlcNAcα1-3Galβ1-3GlcNAcβ-sp2        |                                            | 10316 | 9 | 14915 | 9 |
| 401 | Galβ1-3GlcNAcβ1-3Galβ1-3GlcNAcβ-sp3        |                                            | 2680  | 3 | 8965  | 6 |
| 404 | GalNAcα1-3Galβ1-4(Fuca1-3)GlcNAcβ-sp3      | αGalNAcLe <sub>x</sub>                     | 3138  | 1 | 7775  | 6 |
| 405 | Galα1-3(Fuca1-2)Galα1-4GlcNAcβ-sp3         |                                            | 1374  | 1 | 2046  | 2 |
| 406 | GalNAcα1-3(Fuca1-2)Galα1-3GalNAcβ-sp3      |                                            | 4198  | 2 | 4605  | 5 |



|     |                                                      |                            |       |   |      |   |
|-----|------------------------------------------------------|----------------------------|-------|---|------|---|
| 419 | 3-O-SuGalβ1-4GlcNAcβ1-3Galβ1-4GlcNAcβ-sp3            |                            | 464   | 0 | 499  | 0 |
| 420 | 4-O-SuGalβ1-4GlcNAcβ1-3Galβ1-4GlcNAcβ-sp3            |                            | 4601  | 4 | 8092 | 7 |
| 423 | Neu5Acα2-3Galβ1-4(Fuca1-3)GlcNAcβ-sp3                | SiaLe <sup>x</sup>         | 262   | 0 | 241  | 0 |
| 425 | Neu5Acα2-3Galβ1-4(Fucβ1-3)GlcNAcβ-sp3                |                            | 1689  | 1 | 317  | 0 |
| 426 | Neu5Acα2-3Galβ1-3(Fuca1-4)GlcNAcβ-sp3                | SiaLe <sup>a</sup>         | 311   | 0 | 236  | 0 |
| 428 | Neu5Acα2-3Galβ1-4(Fuca1-3)(6-O-Su)GlcNAcβ-sp3        | 6-O-Su-SiaLe <sup>x</sup>  | 505   | 0 | 253  | 0 |
| 429 | Neu5Acα2-3(6-O-Su)Galβ1-4(Fuca1-3)GlcNAcβ-sp3        | 6'-O-Su-SiaLe <sup>x</sup> | 292   | 0 | 369  | 0 |
| 431 | Neu5Acα2-3Galβ1-4(2-O-Su-Fuca1-3)GlcNAcβ-sp3         |                            | 238   | 0 | 244  | 0 |
| 432 | Neu5Acα2-3Galβ1-4(3-O-Su-Fuca1-3)GlcNAcβ-sp3         |                            | 462   | 0 | 395  | 0 |
| 433 | Neu5Acα2-6(Neu5Acα2-3Galβ1-3)GalNAcα-sp3             |                            | 834   | 1 | 178  | 0 |
| 434 | Neu5Acα2-8Neu5Acα2-3Galβ1-4Glcβ-sp4                  | GD3                        | 6320  | 4 | 1221 | 1 |
| 435 | Neu5Acα2-3Galβ1-4(2-O-Su-Fuca1-3)(6-O-Su)GlcNAcβ-sp3 |                            | 374   | 0 | 573  | 1 |
| 436 | 4-O-Su-Neu5Acα2-3Galβ1-4(Fuca1-3)(6-O-Su)GlcNAcβ-sp3 |                            | 472   | 0 | 903  | 0 |
| 437 | GalNAcα1-3(Fuca1-2)Galβ1-3GalNAcβ-sp3                | A(type 4)                  | 10036 | 5 | 6650 | 5 |
| 438 | Fucβ1-2Galβ1-4(Fuca1-3)GlcNAcβ-sp3                   |                            | 805   | 0 | 2364 | 3 |
| 439 | Kdoα2-4Kdoα2-4Kdoα2-6GlcNAcβ-sp11                    |                            | 4774  | 3 | 6827 | 5 |
| 440 | Neu5Acβ2-6(Fuca1-2)Galβ1-4GlcNAcβ-sp3                |                            | 748   | 0 | 3748 | 4 |
| 441 | Neu5Acα2-6(Fuca1-2)Galβ1-4GlcNAcβ-sp3                |                            | 245   | 0 | 147  | 0 |
| 479 | Fuca1-2Galβ1-3GlcNAcβ1-3Galβ1-4Glcβ-sp4              | H(type1), LNFP I           | 7304  | 4 | 1949 | 2 |
| 480 | Fuca1-2Galβ1-3GlcNAcβ1-3Galβ1-4GlcNAcβ-sp2           | H(type 1) penta            | 316   | 0 | 370  | 0 |
| 481 | Galα1-3Galβ1-4GlcNAcβ1-3Galβ1-4Glcβ-sp4              | Galili (penta)             | 11987 | 6 | 6156 | 5 |
| 482 | Galα1-3(Fuca1-2)Galβ1-3(Fuca1-4)GlcNAcβ-sp3          | BLe <sup>b</sup>           | 1494  | 1 | 1311 | 1 |
| 483 | Galα1-3(Fuca1-2)Galβ1-4(Fuca1-3)GlcNAcβ-sp3          | BLe <sup>y</sup>           | 1006  | 1 | 1016 | 0 |
| 484 | GalNAcα1-3(Fuca1-2)Galβ1-3(Fuca1-4)GlcNAcβ-sp3       | ALe <sup>b</sup>           | 1548  | 1 | 1971 | 2 |
| 485 | Galβ1-4GalNAcα1-3(Fuca1-2)Galβ1-4GlcNAcβ-sp3         |                            | 1733  | 1 | 3789 | 4 |
| 491 | GalNAcα1-3(Fuca1-2)Galβ1-4(Fuca1-3)GlcNAcβ-sp3       | ALe <sup>y</sup>           | 1804  | 2 | 3697 | 4 |
| 492 | (Glcα1-6) <sub>5</sub> β-sp4                         | isomaltopen<br>taose       | 1746  | 1 | 1824 | 1 |
| 493 | (GlcNAcβ1-4) <sub>5</sub> β-sp4                      | chitopentao<br>se          | 2162  | 1 | 3545 | 5 |

## Supplementary Material

|     |                                                                                                                                                                                                                     |                         |       |   |       |    |
|-----|---------------------------------------------------------------------------------------------------------------------------------------------------------------------------------------------------------------------|-------------------------|-------|---|-------|----|
| 495 | Man $\alpha$ 1-6(Man $\alpha$ 1-3)Man $\alpha$ 1-6(Man $\alpha$ 1-3)Man $\beta$ -sp4                                                                                                                                | Man <sub>5</sub>        | 507   | 0 | 952   | 1  |
| 496 | Fuc $\alpha$ 1-2Gal $\beta$ 1-3(Fuca1-4)GlcNAc $\beta$ 1-3Gal $\beta$ 1-4Glc $\beta$ -sp4                                                                                                                           | Le <sup>b</sup> (hexa)  | 7203  | 3 | 3248  | 3  |
| 497 | Fuc $\alpha$ 1-2Gal $\beta$ 1-4(Fuca1-3)GlcNAc $\beta$ 1-3Gal $\beta$ 1-4Glc $\beta$ -sp4                                                                                                                           | Le <sup>y</sup> (hexa)  | 6252  | 3 | 2006  | 2  |
| 498 | Gal $\beta$ 1-4GlcNAc $\beta$ 1-3Gal $\beta$ 1-4GlcNAc $\beta$ 1-3Gal $\beta$ 1-4GlcNAc $\beta$ -sp3                                                                                                                | (LN) <sub>3</sub>       | 323   | 0 | 375   | 0  |
| 499 | Gal $\beta$ 1-4GlcNAc $\beta$ 1-6(Gal $\beta$ 1-4GlcNAc $\beta$ 1-3)Gal $\beta$ 1-4GlcNAc $\beta$ -sp2                                                                                                              | I                       | 671   | 1 | 203   | 0  |
| 501 | Gal $\beta$ 1-3GalNAc $\beta$ 1-3Gal $\alpha$ 1-4Gal $\beta$ 1-4Glc $\beta$ -sp4                                                                                                                                    | Gb5                     | 6516  | 5 | 9659  | 8  |
| 502 | (Glc $\alpha$ 1-6) <sub>6</sub> $\beta$ -sp4                                                                                                                                                                        | isomaltohex<br>aose     | 1947  | 2 | 1614  | 1  |
| 503 | (GlcNAc $\beta$ 1-4) <sub>6</sub> -sp4                                                                                                                                                                              | chitohexaos<br>e        | 2022  | 2 | 3749  | 4  |
| 504 | (A $\beta$ 1-4GN $\beta$ 1-2M $\alpha$ 1) <sub>2-3,6</sub> -M $\beta$ 1-4GN $\beta$ 1-4GN $\beta$ -sp4                                                                                                              |                         | 267   | 0 | 142   | 0  |
| 505 | (GN $\beta$ 1-2M $\alpha$ 1) <sub>2-3,6</sub> -M $\beta$ 1-4GN $\beta$ 1-4GN $\beta$ -sp4                                                                                                                           |                         | 260   | 0 | 183   | 0  |
| 506 | Ara $\beta$ 1-2Ara $\alpha$ 1-5(Ara $\beta$ 1-2Ara $\alpha$ 1-3)Ara $\alpha$ 1-5Ara $\alpha$ -O(CH <sub>2</sub> ) <sub>2</sub> NHCOCH <sub>2</sub> (OCH <sub>2</sub> CH <sub>2</sub> ) <sub>6</sub> NH <sub>2</sub> | Ara <sub>6</sub>        | 10893 | 6 | 9096  | 6  |
| 507 | GalNAc $\alpha$ 1-3GalNAc $\beta$ 1-3Gal $\alpha$ 1-4Gal $\beta$ 1-4Glc $\beta$ -sp3                                                                                                                                | Fs-5                    | 4148  | 5 | 16634 | 10 |
| 508 | GalNAc $\beta$ 1-3(Fuca1-2)Gal $\beta$ 1-4(Fuca1-3)GlcNAc $\beta$ -sp3                                                                                                                                              |                         | 764   | 0 | 1626  | 1  |
| 509 | Gal $\beta$ 1-3GalNAc $\beta$ 1-4(Neu5Ac $\alpha$ 2-3)Gal $\beta$ 1-4Glc $\beta$ -sp4                                                                                                                               | GM1                     | 513   | 0 | 1247  | 1  |
| 527 | Neu5Ac $\alpha$ 2-3Gal $\beta$ 1-4GlcNAc $\beta$ 1-3Gal $\beta$ 1-4GlcNAc $\beta$ -sp2                                                                                                                              |                         | 388   | 0 | 391   | 0  |
| 528 | Neu5Ac $\alpha$ 2-3Gal $\beta$ 1-4(Fuca1-3)GlcNAc $\beta$ 1-3Gal $\beta$ -sp3                                                                                                                                       | SiaLe <sup>x</sup> -Gal | 409   | 0 | 508   | 0  |
| 529 | Neu5Ac $\alpha$ 2-6(Gal $\beta$ 1-3)GlcNAc $\beta$ 1-3Gal $\beta$ 1-4Glc $\beta$ -sp4                                                                                                                               | LSTb                    | 4160  | 3 | 1777  | 1  |
| 530 | (Neu5Ac $\alpha$ 2-3Gal $\beta$ 1) <sub>2-3,4</sub> -GlcNAc $\beta$ -sp3                                                                                                                                            |                         | 218   | 0 | 152   | 0  |
| 531 | Neu5Ac $\alpha$ 2-8Neu5Ac $\alpha$ 2-3(GalNAc $\beta$ 1-4)Gal $\beta$ 1-4Glc $\beta$ -sp2                                                                                                                           | GD2                     | 641   | 0 | 2069  | 1  |
| 534 | Neu5Ac $\alpha$ 2-6Gal $\beta$ 1-4GlcNAc $\beta$ 1-3Gal $\beta$ 1-4GlcNAc $\beta$ -sp3                                                                                                                              |                         | 1161  | 1 | 290   | 0  |
| 535 | Neu5Ac $\alpha$ 2-8Neu5Ac $\alpha$ 2-3(GalNAc $\beta$ 1-4)Gal $\beta$ 1-4Glc $\beta$ -sp4                                                                                                                           | GD2                     | 1524  | 2 | 850   | 1  |
| 536 | Neu5Ac $\alpha$ 2-3Gal $\beta$ 1-3GlcNAc $\beta$ 1-3Gal $\beta$ 1-4Glc $\beta$ -sp4                                                                                                                                 | LSTa                    | 10168 | 5 | 2332  | 3  |
| 537 | Neu5Ac $\alpha$ 2-3Gal $\beta$ 1-4GlcNAc $\beta$ 1-3Gal $\beta$ 1-4Glc $\beta$ -sp4                                                                                                                                 | LSTd                    | 9594  | 5 | 2335  | 3  |
| 538 | Gal $\beta$ 1-4(Fuca1-3)GlcNAc $\beta$ 1-6(Gal $\beta$ 1-3)GlcNAc $\beta$ 1-3Gal $\beta$ 1-4Glc $\beta$ -sp4                                                                                                        | MFLNH III               | 2235  | 2 | 782   | 1  |
| 539 | Gal $\beta$ 1-4GlcNAc $\beta$ 1-6(Fuca1-2Gal $\beta$ 1-3)GlcNAc $\beta$ 1-3Gal $\beta$ 1-4Glc $\beta$ -sp4                                                                                                          | MFLNH I                 | 415   | 0 | 224   | 0  |
| 540 | Gal $\beta$ 1-4(Fuca1-3)GlcNAc $\beta$ 1-6(Neu5Ac $\alpha$ 2-6Gal $\beta$ 1-4GlcNAc $\beta$ 1-3)Gal $\beta$ 1-4Glc $\beta$ -sp4                                                                                     | MSMFLNn<br>H            | 938   | 1 | 552   | 1  |

|     |                                                                                                                                  |                 |       |    |      |   |
|-----|----------------------------------------------------------------------------------------------------------------------------------|-----------------|-------|----|------|---|
| 541 | Galβ1-4(Fuca1-3)GlcNAcβ1-6(Fuca1-2Galβ1-3GlcNAcβ1-3)Galβ1-4Glcβ-sp4                                                              | DFLNH (a)       | 1236  | 1  | 769  | 1 |
| 542 | Galβ1-3GlcNAcβ1-3Galβ1-4(Fuca1-3)GlcNAcβ1-6(Galβ1-3GlcNAcβ1-3)Galβ1-4Glcβ-sp4                                                    | MF(1-3)iLNO     | 660   | 0  | 1937 | 2 |
| 545 | Kdoα2-8Kdoα2-4Kdoα2GlcNAcβ1-6GlcNAcα-sp11                                                                                        |                 | 8516  | 6  | 8088 | 8 |
| 625 | (GlcAβ1-3GlcNAcβ1-4) <sub>11-12</sub> -NH <sub>2</sub> -ol                                                                       | hyaluronic acid | 634   | 0  | 3389 | 1 |
| 627 | (Siaα2-6Aβ1-4GNβ1-2Mα1)2-3,6-Mβ1-4GNβ1-4GNβ-sp4                                                                                  | 11-OS, YDS      | 269   | 0  | 136  | 0 |
| 629 | Trehalose-ethanolamine                                                                                                           |                 | 344   | 0  | 995  | 1 |
| 630 | (GlcAβ1-3GlcNAcβ1-4) <sub>20</sub> -NH( <i>p</i> -C <sub>6</sub> H <sub>4</sub> )CH <sub>2</sub> CH <sub>2</sub> NH <sub>2</sub> | hyaluronic acid | 2342  | 2  | 1728 | 2 |
| 631 | (GlcAβ1-3GlcNAcβ1-4) <sub>38</sub> -NH( <i>p</i> -C <sub>6</sub> H <sub>4</sub> )CH <sub>2</sub> CH <sub>2</sub> NH <sub>2</sub> | hyaluronic acid | 755   | 1  | 676  | 0 |
| 632 | (GlcAβ1-3GlcNAcβ1-4) <sub>13</sub> -NH( <i>p</i> -C <sub>6</sub> H <sub>4</sub> )CH <sub>2</sub> CH <sub>2</sub> NH <sub>2</sub> | hyaluronic acid | 710   | 0  | 2377 | 1 |
| 800 | GlcNAcα1-4GlcNAcβ-sp3                                                                                                            |                 | 8580  | 5  | 9035 | 6 |
| 801 | GalNAcα1-3GalNAc(fur)β-sp3                                                                                                       |                 | 2985  | 3  | 6799 | 5 |
| 802 | Galβ1-3GalNAc(fur)β-sp3                                                                                                          |                 | 2236  | 1  | 9471 | 8 |
| 804 | [Galβ1-4GlcNAcβ-OCH <sub>2</sub> CH <sub>2</sub> ] <sub>2</sub> NH                                                               |                 | 360   | 0  | 580  | 0 |
| 805 | GalNAcβ1-4(6-O-Bn)GlcNAcβ-sp3                                                                                                    |                 | 1490  | 1  | 5025 | 4 |
| 806 | Galα1-6Glcα-sp3                                                                                                                  |                 | 14739 | 9  | 6689 | 8 |
| 807 | GlcNAcβ1-4GlcNAcα-sp4                                                                                                            |                 | 7505  | 8  | 7435 | 7 |
| 808 | Galα1-6Glcβ-sp3                                                                                                                  | melibiose       | 15978 | 10 | 6956 | 8 |
| 809 | GalNAcβ1-3GalNAcα-sp3                                                                                                            |                 | 4753  | 4  | 6160 | 7 |
| 810 | GalNGα1-3GalNAcα-sp3                                                                                                             |                 | 1106  | 0  | 8676 | 4 |
| 850 | Galβ1-3(6-O-Su)GalNAcα-sp3                                                                                                       | 6-suTF          | 991   | 0  | 4145 | 4 |
| 851 | Galα1-3(6-O-Su)GalNAcα-sp3                                                                                                       |                 | 723   | 0  | 2569 | 3 |
| 852 | GlcNAcβ1-4-[HOOC(CH <sub>3</sub> )CH]-3-O-GlcNAcα-sp4                                                                            |                 | 6242  | 3  | 4057 | 5 |

sp2 = -O(CH<sub>2</sub>)<sub>2</sub>NH<sub>2</sub>

sp3 = -O(CH<sub>2</sub>)<sub>3</sub>NH<sub>2</sub>

sp4 = -NHCOCH<sub>2</sub>NH<sub>2</sub>

sp5 = -O(CH<sub>2</sub>)<sub>3</sub>NH-CO(CH<sub>2</sub>)<sub>5</sub>NH<sub>2</sub>

sp8 = -(OCH<sub>2</sub>CH<sub>2</sub>)<sub>6</sub>NH<sub>2</sub>
